# Supplementary material for: Alternative splicing in tea plants was extensively triggered by drought, heat and their combined stresses
Source: PeerJ. 2020 Jan 29;8:e8258. doi: 10.7717/peerj.8258 (PMC6995271; doi:10.7717/peerj.8258)
Supplement: Supplemental Information 13 [file peerj-08-8258-s013.xlsx]

## Sheet: Sheet1
DT	0h	24h	48h	72h	96h
LWC	0.7683	0.7381	0.6924	0.6559	0.6569
	0.739	0.7326	0.7022	0.6603	0.6332
	0.7683	0.7424	0.6691	0.6445	0.6201
	0.758533	0.7377	0.6879	0.653567	0.636733
REC	0.1628	0.1975	0.2476	0.2736	0.4977
	0.1431	0.1933	0.219	0.2971	0.4713
	0.1522	0.1841	0.2572	0.2979	0.4897
	0.1527	0.191633	0.241267	0.2895	0.4862
Fv\Fm	0.863	0.78	0.801	0.742	0.694
	0.852	0.81	0.827	0.756	0.683
	0.845	0.795	0.805	0.735	0.669
	0.853	0.795	0.811	0.744	0.682
HT	0h	24h	48h	72h	96h
LWC	0.729	0.7096	0.7111	0.6659	0.6672
	0.7371	0.7335	0.6916	0.6835	0.654
	0.7289	0.7167	0.6948	0.7105	0.652
	0.7317	0.719933	0.699167	0.686633	0.6577
REC	0.1813	0.1866	0.2259	0.2613	0.3517
	0.1918	0.198	0.2538	0.2354	0.344
	0.1865	0.194	0.2332	0.2462	0.2677
	0.186533	0.192867	0.237633	0.247633	0.321133
Fv\Fm	0.832	0.804	0.817	0.796	0.732
	0.871	0.771	0.79	0.764	0.751
	0.862	0.794	0.776	0.786	0.752
	0.855	0.79	0.794	0.782	0.745
HD	0h	24h	48h	72h	96h
LWC	0.7248	0.7109	0.6945	0.6379	0.5542
	0.7355	0.7079	0.6995	0.6319	0.5557
	0.7269	0.7033	0.6981	0.6331	0.5622
	0.7357	0.707367	0.697367	0.6343	0.557367
REC	0.1583	0.1663	0.2072	0.351	0.5173
	0.1599	0.1655	0.2145	0.3498	0.5013
	0.1354	0.1604	0.2122	0.3584	0.5088
	0.1512	0.164067	0.2113	0.353067	0.509133
Fv\Fm	0.838	0.761	0.796	0.708	0.65
	0.865	0.791	0.781	0.726	0.626
	0.829	0.806	0.784	0.738	0.67
	0.844	0.786	0.787	0.724	0.649
