# Supplementary material for: Alternative splicing in tea plants was extensively triggered by drought, heat and their combined stresses
Source: PeerJ. 2020 Jan 29;8:e8258. doi: 10.7717/peerj.8258 (PMC6995271; doi:10.7717/peerj.8258)
Supplement: Table S1 [file peerj-08-8258-s006.xlsx]

## Sheet: Sheet1
Table S1 Primers used in qRT-PCR validation of AS gene expression
Primers	Sequences (5'-3')
CsMYB59-F	GACTCCATAGCAAAAGTTTCAGGC
CsMYB59-R	TTGGTCTCCACGAAGGGCAT
CsHSP90-5-F	AAAGGTCCAAGTTTCAAAGCGTC
CsHSP90-5-R	AGCCATTGCCATCATCTCGT
CsCLASRP-F	GAGATGCTGCCCAGATTACCG
CsCLASRP-R	TGTTATACTCACTGCCACTCGTCC
CsCDPK1-F	TTGATGTCTGGAGTGCTGGAGTAA
CsCDPK1-R	AGCCTTGTTGGCGTTTTGTAAC
CsNPR1-F	TGTCGCCAACACCGAATCTC
CsNPR1-R	AAGCGTATAGCACCTCCACCAT
CsCAMTA3-F	ACTTCGTTGCCATACTCCGTTAC
CsCAMTA3-R	AATGACTGCACCCTGTAGACTTGA
CsbZIP8-F	TCTGTTTCGCCGGTTCCTTAT
CsbZIP8-R	TTCTGCTTCCAACTCCATCGTAT
CsGOLS-F	CGGAGACATCCAGGTGTTTGA
CsGOLS-R	TGCCAGCATTGAAGTAGAGGG
GAPDH-F	TTGGCATCGTTGAGGGTCT
GAPDH-R	CAGTGGGAACACGGAAAGC
