# Supplementary material for: Alternative splicing in tea plants was extensively triggered by drought, heat and their combined stresses
Source: PeerJ. 2020 Jan 29;8:e8258. doi: 10.7717/peerj.8258 (PMC6995271; doi:10.7717/peerj.8258)
Supplement: Table S2 [file peerj-08-8258-s007.xlsx]

## Sheet: Table S1
Table S2 Primers used in RT-PCR validation of stress responsive AS events
Primers	Sequences (5'-3')
CSMYB59-F	TGGACAGAACAAGAAGATGTACAAC
CSMYB59-R	GTGAGTCCTCCAGTAGTTCTTGATC
CSHSP90-5-F	GAGGTCAGCCGCTTGTTGGA
CSHSP90-5-R	GGTGCCATGCCAGGAATGTA
CSCLASRP-F	GTCAGAGACGAGCAGTGTATTTGGC
CSCLASRP-R	AGCTTGTGATGGAGGAGACAGTGGT
CSCDPK1-F	TTGGGCTGTCGGTGTTCTTTAA
CSCDPK1-R	CACTTCCTCCACTGACAAATGCT
CSNPR1-F	TCGCCAACACCGAATCTC
CSNPR1-R	GGAAGCGTATAGCACCTCCA
