# Supplementary material for: Alternative splicing in tea plants was extensively triggered by drought, heat and their combined stresses
Source: PeerJ. 2020 Jan 29;8:e8258. doi: 10.7717/peerj.8258 (PMC6995271; doi:10.7717/peerj.8258)
Supplement: Table S3 [file peerj-08-8258-s008.xlsx]

## Sheet: DT
Table S3 Statistical summary of transcription factors that were alternatively spliced (under DT, HT and HD)
	Gene ID	NR Description
NAC	CSA010933	gi|925170157|gb|ALC78995.1| NAC transcription factors 18 [Manihot esculenta] gi|1035930606|gb|OAY60192.1| hypothetical protein MANES_01G093200 [Manihot esculenta]
	CSA004675	gi|802783483|ref|XP_012091551.1| PREDICTED: NAC transcription factor 25 isoform X1 [Jatropha curcas] gi|495025571|gb|AGL39685.1| NAC transcription factor 029 [Jatropha curcas] gi|643703859|gb|KDP20923.1| hypothetical protein JCGZ_21394 [Jatropha curcas]
	CSA019815	gi|529406735|gb|AGT01909.1| NAC transcription factor [Camellia sinensis]
WRKY	CSA004281	gi|731395672|ref|XP_002270750.3| PREDICTED: probable WRKY transcription factor 65 [Vitis vinifera] gi|297743986|emb|CBI36956.3| unnamed protein product [Vitis vinifera]
	CSA000116	gi|731377844|ref|XP_010658402.1| PREDICTED: WRKY transcription factor 22-like isoform X2 [Vitis vinifera]
	CSA001128	gi|702263881|ref|XP_010038933.1| PREDICTED: probable WRKY transcription factor 21 [Eucalyptus grandis] gi|629120196|gb|KCW84686.1| hypothetical protein EUGRSUZ_B01503 [Eucalyptus grandis]
	CSA019455	gi|225463536|ref|XP_002265612.1| PREDICTED: probable WRKY transcription factor 2 [Vitis vinifera] gi|731433573|ref|XP_010644699.1| PREDICTED: probable WRKY transcription factor 2 [Vitis vinifera] gi|731433575|ref|XP_010644700.1| PREDICTED: probable WRKY transcription factor 2 [Vitis vinifera]
	CSA016849	gi|645231018|ref|XP_008222197.1| PREDICTED: probable WRKY transcription factor 75 [Prunus mume]
	CSA027870	gi|731416983|ref|XP_002270614.2| PREDICTED: probable WRKY transcription factor 74 [Vitis vinifera]
	CSA003106	gi|976909769|gb|KVH96797.1| DNA-binding WRKY [Cynara cardunculus var. scolymus]
	CSA026670	gi|225447598|ref|XP_002272407.1| PREDICTED: probable WRKY transcription factor 20 isoform X1 [Vitis vinifera] gi|731410093|ref|XP_010657427.1| PREDICTED: probable WRKY transcription factor 20 isoform X1 [Vitis vinifera]
	CSA017015	gi|720063885|ref|XP_010275778.1| PREDICTED: probable WRKY transcription factor 40 [Nelumbo nucifera]
	CSA024124	gi|970002364|ref|XP_015061786.1| PREDICTED: WRKY transcription factor 22-like [Solanum pennellii]
	CSA017927	gi|387158756|gb|AFJ54352.1| WRKY transcription factor [Camellia sinensis]
	CSA008877	gi|720063885|ref|XP_010275778.1| PREDICTED: probable WRKY transcription factor 40 [Nelumbo nucifera]
	CSA023014	gi|645227462|ref|XP_008220528.1| PREDICTED: probable WRKY transcription factor 50 isoform X2 [Prunus mume]
	CSA028948	gi|387158756|gb|AFJ54352.1| WRKY transcription factor [Camellia sinensis]
	CSA021419	gi|225444291|ref|XP_002263115.1| PREDICTED: probable WRKY transcription factor 31 [Vitis vinifera]
	CSA014061	gi|1009118274|ref|XP_015875770.1| PREDICTED: WRKY transcription factor SUSIBA2-like [Ziziphus jujuba]
	CSA001788	gi|225423515|ref|XP_002274549.1| PREDICTED: probable WRKY transcription factor 57 [Vitis vinifera]
	CSA020053	gi|720030796|ref|XP_010265617.1| PREDICTED: probable WRKY transcription factor 40 [Nelumbo nucifera]
	CSA011929	gi|590724039|ref|XP_007052352.1| WRKY family transcription factor [Theobroma cacao] gi|508704613|gb|EOX96509.1| WRKY family transcription factor [Theobroma cacao]
MYB	CSA001529	gi|645236279|ref|XP_008224659.1| PREDICTED: myb family transcription factor APL-like isoform X1 [Prunus mume]
	CSA002022	gi|902573607|gb|AKR80572.1| R3 MYB transcription factor [Vaccinium uliginosum]
	CSA031753	gi|294847482|gb|ADF43752.1| MYB [Camellia sinensis]
	CSA016959	gi|198400321|gb|ACH87169.1| MYB transcription factor [Camellia sinensis]
	CSA031745	gi|731372885|ref|XP_010651000.1| PREDICTED: putative Myb family transcription factor At1g14600 isoform X1 [Vitis vinifera]
	CSA004892	gi|731434515|ref|XP_010645092.1| PREDICTED: myb family transcription factor APL isoform X1 [Vitis vinifera]
	CSA035694	gi|225431879|ref|XP_002271862.1| PREDICTED: transcription factor MYB12 [Vitis vinifera]
	CSA029288	gi|757114689|emb|CEL26639.1| MYB10 [Ribes nigrum]
	CSA006559	gi|225426160|ref|XP_002273004.1| PREDICTED: transcription factor MYB86 [Vitis vinifera] gi|297742235|emb|CBI34384.3| unnamed protein product [Vitis vinifera]
	CSA036097	gi|1021477499|ref|XP_016176267.1| PREDICTED: transcription factor MYB86-like [Arachis ipaensis]
	CSA023502	gi|526117848|ref|NP_001268129.1| flavonoid-related R2R3 MYB 4a repressor transcription factor [Vitis vinifera] gi|119220854|gb|ABL61515.1| R2R3 Myb4a C2 repressor motif protein [Vitis vinifera]
	CSA012996	gi|954050148|gb|ALP43794.1| transcription factor MYB4, partial [Vaccinium corymbosum]
	CSA012569	gi|675242690|dbj|BAP39802.1| R2R3 MYB transcription factor [Vitis vinifera]
	CSA002899	gi|868987220|gb|AKP06174.1| MYB6 [Diospyros kaki]
	CSA012418	gi|954050154|gb|ALP43797.1| transcription factor MYB10, partial [Vaccinium corymbosum]
	CSA030968	gi|1009165964|ref|XP_015901330.1| PREDICTED: myb family transcription factor APL [Ziziphus jujuba]
	CSA006029	gi|971569463|ref|XP_015169157.1| PREDICTED: transcription factor MYB1R1-like [Solanum tuberosum]
	CSA017943	gi|225457011|ref|XP_002279033.1| PREDICTED: transcription factor MYB98 [Vitis vinifera] gi|297733769|emb|CBI15016.3| unnamed protein product [Vitis vinifera]
	CSA012419	gi|954050154|gb|ALP43797.1| transcription factor MYB10, partial [Vaccinium corymbosum]
	CSA034180	gi|198400321|gb|ACH87169.1| MYB transcription factor [Camellia sinensis]
	CSA011129	gi|1009165964|ref|XP_015901330.1| PREDICTED: myb family transcription factor APL [Ziziphus jujuba]
	CSA034397	gi|1025201400|ref|XP_016477167.1| PREDICTED: transcription factor MYB48-like [Nicotiana tabacum]
	CSA016961	gi|198400321|gb|ACH87169.1| MYB transcription factor [Camellia sinensis]
	CSA020441	gi|702274804|ref|XP_010044170.1| PREDICTED: transcription repressor MYB4-like [Eucalyptus grandis] gi|629121717|gb|KCW86207.1| hypothetical protein EUGRSUZ_B02896 [Eucalyptus grandis]
	CSA033435	gi|568846614|ref|XP_006477144.1| PREDICTED: transcription factor MYB1R1 [Citrus sinensis]
	CSA007325	gi|338173759|gb|AEI83426.1| transcription factor R2R3-MYB2 [Camellia sinensis]
	CSA005733	gi|719968261|ref|XP_010264231.1| PREDICTED: transcription factor MYB108-like [Nelumbo nucifera]
	CSA036087	gi|225449813|ref|XP_002275846.1| PREDICTED: transcription factor GAMYB [Vitis vinifera] gi|731435946|ref|XP_010645528.1| PREDICTED: transcription factor GAMYB [Vitis vinifera] gi|731435948|ref|XP_010645529.1| PREDICTED: transcription factor GAMYB [Vitis vinifera] gi|731435950|ref|XP_010645530.1| PREDICTED: transcription factor GAMYB [Vitis vinifera] gi|731435952|ref|XP_010645531.1| PREDICTED: tra…
	CSA014836	gi|743928061|ref|XP_011008225.1| PREDICTED: transcription factor MYB86-like [Populus euphratica]
	CSA021518	gi|743786458|ref|XP_011027944.1| PREDICTED: transcription factor MYB108-like [Populus euphratica]
	CSA029852	gi|702325655|ref|XP_010053502.1| PREDICTED: transcription factor MYB114-like [Eucalyptus grandis] gi|702325663|ref|XP_010053503.1| PREDICTED: transcription factor MYB114-like [Eucalyptus grandis] gi|629112850|gb|KCW77810.1| hypothetical protein EUGRSUZ_D02099 [Eucalyptus grandis]
	CSA020478	gi|1000950218|ref|XP_015579667.1| PREDICTED: transcription factor MYB82 [Ricinus communis]
	CSA022395	gi|868987231|gb|AKP06175.1| MYB7 [Diospyros kaki]
	CSA019678	gi|728845485|gb|KHG24928.1| Transcription factor MYB1R1 [Gossypium arboreum]
	CSA020213	gi|225450423|ref|XP_002276091.1| PREDICTED: transcription factor MYB86 [Vitis vinifera]
	CSA024950	gi|743914637|ref|XP_011001250.1| PREDICTED: transcription repressor MYB6-like [Populus euphratica] gi|743942995|ref|XP_011015999.1| PREDICTED: transcription repressor MYB6-like [Populus euphratica]
	CSA021904	gi|1026067751|ref|XP_016578317.1| PREDICTED: transcription factor MYB1R1-like [Capsicum annuum]
	CSA022687	gi|720020169|ref|XP_010262320.1| PREDICTED: myb-related protein Myb4 [Nelumbo nucifera]
	CSA026317	gi|731434687|ref|XP_010645152.1| PREDICTED: myb-related protein Myb4 [Vitis vinifera]
	CSA026803	gi|590623581|ref|XP_007025361.1| Myb-like HTH transcriptional regulator family protein, putative [Theobroma cacao] gi|508780727|gb|EOY27983.1| Myb-like HTH transcriptional regulator family protein, putative [Theobroma cacao]
	CSA027458	gi|747081429|ref|XP_011087987.1| PREDICTED: myb-binding protein 1A-like protein [Sesamum indicum]
bZIP	CSA015275	gi|459021235|gb|AGG39691.1| bZIP transcription factor bZIP7 [Camellia sinensis]
	CSA002325	gi|590700958|ref|XP_007046280.1| BZIP transcription factor family protein isoform 1 [Theobroma cacao] gi|508710215|gb|EOY02112.1| BZIP transcription factor family protein isoform 1 [Theobroma cacao]
	CSA005460	gi|444300786|gb|AGD98702.1| bZIP transcription factor family protein 4 [Camellia sinensis]
	CSA013598	gi|944545227|gb|ALL97699.1| bZIP transcription factor 12-1 [Camellia sinensis]
	CSA000053	gi|944545239|gb|ALL97705.1| bZIP transcription factor 18 [Camellia sinensis]
	CSA008314	gi|398806220|gb|AFP19453.1| bZIP transcription factor family protein 2 [Camellia sinensis]
	CSA025946	gi|512772657|gb|AGO05994.1| bZIP transcription factor family protein 10 [Camellia sinensis]
	CSA026770	gi|1012124395|ref|XP_015963242.1| PREDICTED: bZIP transcription factor 16 [Arachis duranensis] gi|1012124399|ref|XP_015963243.1| PREDICTED: bZIP transcription factor 16 [Arachis duranensis]
	CSA017740	gi|645265447|ref|XP_008238155.1| PREDICTED: bZIP transcription factor 16 [Prunus mume]

## Sheet: HT
	Gene ID	NR Description
NAC	CSA009011	gi|925170169|gb|ALC79001.1| NAC transcription factors 24 [Manihot esculenta] gi|1035900151|gb|OAY29752.1| hypothetical protein MANES_15G169500 [Manihot esculenta]
	CSA031084	gi|378405610|gb|AFB82644.1| NAC transcription factor [Camellia sinensis]
	CSA023606	gi|925170217|gb|ALC79025.1| NAC transcription factors 48 [Manihot esculenta] gi|1035925351|gb|OAY54939.1| hypothetical protein MANES_03G114300 [Manihot esculenta]
	CSA013449	gi|657980925|ref|XP_008382468.1| PREDICTED: NAC transcription factor 29-like [Malus domestica]
	CSA004675	gi|802783483|ref|XP_012091551.1| PREDICTED: NAC transcription factor 25 isoform X1 [Jatropha curcas] gi|495025571|gb|AGL39685.1| NAC transcription factor 029 [Jatropha curcas] gi|643703859|gb|KDP20923.1| hypothetical protein JCGZ_21394 [Jatropha curcas]
	CSA033177	gi|802567082|ref|XP_012067682.1| PREDICTED: NAC transcription factor 29 [Jatropha curcas] gi|495025553|gb|AGL39683.1| NAC transcription factor 027 [Jatropha curcas] gi|643734557|gb|KDP41227.1| hypothetical protein JCGZ_15634 [Jatropha curcas]
	CSA027185	gi|925170155|gb|ALC78994.1| NAC transcription factors 17 [Manihot esculenta] gi|1035918005|gb|OAY47596.1| hypothetical protein MANES_06G090500 [Manihot esculenta] gi|1035918006|gb|OAY47597.1| hypothetical protein MANES_06G090500 [Manihot esculenta]
	CSA006147	gi|698532063|ref|XP_009762857.1| PREDICTED: NAC transcription factor 25 isoform X1 [Nicotiana sylvestris] gi|1025100819|ref|XP_016458989.1| PREDICTED: NAC domain-containing protein 104-like [Nicotiana tabacum]
	CSA019815	gi|529406735|gb|AGT01909.1| NAC transcription factor [Camellia sinensis]
WRKY	CSA029390	gi|386686575|gb|AFJ20666.1| WRKY transcription factor 40 [Camellia sinensis]
	CSA015399	gi|225466161|ref|XP_002262775.1| PREDICTED: probable WRKY transcription factor 17 [Vitis vinifera] gi|183979106|emb|CAP08302.1| DNA-binding protein [Vitis thunbergii]
	CSA016054	gi|225432004|ref|XP_002279385.1| PREDICTED: probable WRKY transcription factor 48 [Vitis vinifera] gi|296083226|emb|CBI22862.3| unnamed protein product [Vitis vinifera]
	CSA000116	gi|731377844|ref|XP_010658402.1| PREDICTED: WRKY transcription factor 22-like isoform X2 [Vitis vinifera]
	CSA021419	gi|225444291|ref|XP_002263115.1| PREDICTED: probable WRKY transcription factor 31 [Vitis vinifera]
	CSA001128	gi|702263881|ref|XP_010038933.1| PREDICTED: probable WRKY transcription factor 21 [Eucalyptus grandis] gi|629120196|gb|KCW84686.1| hypothetical protein EUGRSUZ_B01503 [Eucalyptus grandis]
	CSA026670	gi|225447598|ref|XP_002272407.1| PREDICTED: probable WRKY transcription factor 20 isoform X1 [Vitis vinifera] gi|731410093|ref|XP_010657427.1| PREDICTED: probable WRKY transcription factor 20 isoform X1 [Vitis vinifera]
	CSA017015	gi|720063885|ref|XP_010275778.1| PREDICTED: probable WRKY transcription factor 40 [Nelumbo nucifera]
	CSA024124	gi|970002364|ref|XP_015061786.1| PREDICTED: WRKY transcription factor 22-like [Solanum pennellii]
	CSA017927	gi|387158756|gb|AFJ54352.1| WRKY transcription factor [Camellia sinensis]
	CSA002710	gi|225451489|ref|XP_002274387.1| PREDICTED: probable WRKY transcription factor 75 [Vitis vinifera] gi|296082324|emb|CBI21329.3| unnamed protein product [Vitis vinifera] gi|388324555|gb|AFK27601.1| WRKY45 [Vitis amurensis]
	CSA008877	gi|720063885|ref|XP_010275778.1| PREDICTED: probable WRKY transcription factor 40 [Nelumbo nucifera]
	CSA023014	gi|645227462|ref|XP_008220528.1| PREDICTED: probable WRKY transcription factor 50 isoform X2 [Prunus mume]
	CSA028948	gi|387158756|gb|AFJ54352.1| WRKY transcription factor [Camellia sinensis]
	CSA005519	gi|225438803|ref|XP_002283219.1| PREDICTED: probable WRKY transcription factor 7 [Vitis vinifera]
	CSA001140	gi|720016168|ref|XP_010261070.1| PREDICTED: probable WRKY transcription factor 51 [Nelumbo nucifera]
	CSA033166	gi|590721756|ref|XP_007051705.1| WRKY transcription factor 23, putative [Theobroma cacao] gi|508703966|gb|EOX95862.1| WRKY transcription factor 23, putative [Theobroma cacao]
	CSA020053	gi|720030796|ref|XP_010265617.1| PREDICTED: probable WRKY transcription factor 40 [Nelumbo nucifera]
	CSA019455	gi|225463536|ref|XP_002265612.1| PREDICTED: probable WRKY transcription factor 2 [Vitis vinifera] gi|731433573|ref|XP_010644699.1| PREDICTED: probable WRKY transcription factor 2 [Vitis vinifera] gi|731433575|ref|XP_010644700.1| PREDICTED: probable WRKY transcription factor 2 [Vitis vinifera]
	CSA005707	gi|731407744|ref|XP_010656605.1| PREDICTED: probable WRKY transcription factor 32 isoform X1 [Vitis vinifera]
	CSA020766	gi|743790041|ref|XP_011037871.1| PREDICTED: probable WRKY transcription factor 46 [Populus euphratica]
	CSA009535	gi|294861116|gb|ADF45433.1| WRKY1 [Hevea brasiliensis]
	CSA033847	gi|1001980708|gb|AMM45798.1| WRKY5 transcription factor [Panax ginseng]
	CSA013413	gi|590571926|ref|XP_007011727.1| WRKY transcription factor, putative [Theobroma cacao] gi|508782090|gb|EOY29346.1| WRKY transcription factor, putative [Theobroma cacao]
MYB	CSA012569	gi|675242690|dbj|BAP39802.1| R2R3 MYB transcription factor [Vitis vinifera]
	CSA002022	gi|902573607|gb|AKR80572.1| R3 MYB transcription factor [Vaccinium uliginosum]
	CSA034180	gi|198400321|gb|ACH87169.1| MYB transcription factor [Camellia sinensis]
	CSA016959	gi|198400321|gb|ACH87169.1| MYB transcription factor [Camellia sinensis]
	CSA016961	gi|198400321|gb|ACH87169.1| MYB transcription factor [Camellia sinensis]
	CSA023502	gi|526117848|ref|NP_001268129.1| flavonoid-related R2R3 MYB 4a repressor transcription factor [Vitis vinifera] gi|119220854|gb|ABL61515.1| R2R3 Myb4a C2 repressor motif protein [Vitis vinifera]
	CSA007979	gi|209571357|dbj|BAG75107.1| transcription factor MYB251 [Fagus crenata]
	CSA021904	gi|1026067751|ref|XP_016578317.1| PREDICTED: transcription factor MYB1R1-like [Capsicum annuum]
	CSA029288	gi|757114689|emb|CEL26639.1| MYB10 [Ribes nigrum]
	CSA033435	gi|568846614|ref|XP_006477144.1| PREDICTED: transcription factor MYB1R1 [Citrus sinensis]
	CSA036097	gi|1021477499|ref|XP_016176267.1| PREDICTED: transcription factor MYB86-like [Arachis ipaensis]
	CSA001529	gi|645236279|ref|XP_008224659.1| PREDICTED: myb family transcription factor APL-like isoform X1 [Prunus mume]
	CSA012996	gi|954050148|gb|ALP43794.1| transcription factor MYB4, partial [Vaccinium corymbosum]
	CSA036636	gi|338173757|gb|AEI83425.1| transcription factor R2R3-MYB1 [Camellia sinensis]
	CSA002899	gi|868987220|gb|AKP06174.1| MYB6 [Diospyros kaki]
	CSA036087	gi|225449813|ref|XP_002275846.1| PREDICTED: transcription factor GAMYB [Vitis vinifera] gi|731435946|ref|XP_010645528.1| PREDICTED: transcription factor GAMYB [Vitis vinifera] gi|731435948|ref|XP_010645529.1| PREDICTED: transcription factor GAMYB [Vitis vinifera] gi|731435950|ref|XP_010645530.1| PREDICTED: transcription factor GAMYB [Vitis vinifera] gi|731435952|ref|XP_010645531.1| PREDICTED: tra…
	CSA030968	gi|1009165964|ref|XP_015901330.1| PREDICTED: myb family transcription factor APL [Ziziphus jujuba]
	CSA003863	gi|743907930|ref|XP_011047407.1| PREDICTED: transcription factor MYB46-like [Populus euphratica]
	CSA026317	gi|731434687|ref|XP_010645152.1| PREDICTED: myb-related protein Myb4 [Vitis vinifera]
	CSA025890	gi|590628054|ref|XP_007026615.1| Myb-like HTH transcriptional regulator family protein, putative isoform 1 [Theobroma cacao] gi|590628058|ref|XP_007026616.1| Myb-like HTH transcriptional regulator family protein, putative isoform 1 [Theobroma cacao] gi|508715220|gb|EOY07117.1| Myb-like HTH transcriptional regulator family protein, putative isoform 1 [Theobroma cacao] gi|508715221|gb|EOY07118.1| M…
	CSA014712	gi|731392327|ref|XP_010651059.1| PREDICTED: transcription factor MYB59 [Vitis vinifera]
	CSA036123	gi|566152159|ref|XP_002300173.2| myb family transcription factor family protein [Populus trichocarpa] gi|550348689|gb|EEE84978.2| myb family transcription factor family protein [Populus trichocarpa]
	CSA029852	gi|702325655|ref|XP_010053502.1| PREDICTED: transcription factor MYB114-like [Eucalyptus grandis] gi|702325663|ref|XP_010053503.1| PREDICTED: transcription factor MYB114-like [Eucalyptus grandis] gi|629112850|gb|KCW77810.1| hypothetical protein EUGRSUZ_D02099 [Eucalyptus grandis]
	CSA019678	gi|728845485|gb|KHG24928.1| Transcription factor MYB1R1 [Gossypium arboreum]
	CSA012419	gi|954050154|gb|ALP43797.1| transcription factor MYB10, partial [Vaccinium corymbosum]
	CSA014826	gi|338173757|gb|AEI83425.1| transcription factor R2R3-MYB1 [Camellia sinensis]
	CSA011129	gi|1009165964|ref|XP_015901330.1| PREDICTED: myb family transcription factor APL [Ziziphus jujuba]
	CSA024950	gi|743914637|ref|XP_011001250.1| PREDICTED: transcription repressor MYB6-like [Populus euphratica] gi|743942995|ref|XP_011015999.1| PREDICTED: transcription repressor MYB6-like [Populus euphratica]
	CSA034397	gi|1025201400|ref|XP_016477167.1| PREDICTED: transcription factor MYB48-like [Nicotiana tabacum]
	CSA027458	gi|747081429|ref|XP_011087987.1| PREDICTED: myb-binding protein 1A-like protein [Sesamum indicum]
	CSA020441	gi|702274804|ref|XP_010044170.1| PREDICTED: transcription repressor MYB4-like [Eucalyptus grandis] gi|629121717|gb|KCW86207.1| hypothetical protein EUGRSUZ_B02896 [Eucalyptus grandis]
bZIP	CSA015275	gi|459021235|gb|AGG39691.1| bZIP transcription factor bZIP7 [Camellia sinensis]
	CSA008314	gi|398806220|gb|AFP19453.1| bZIP transcription factor family protein 2 [Camellia sinensis]
	CSA017542	gi|398806220|gb|AFP19453.1| bZIP transcription factor family protein 2 [Camellia sinensis]
	CSA015933	gi|444300788|gb|AGD98703.1| bZIP transcription factor family protein 5 [Camellia sinensis]
	CSA026770	gi|1012124395|ref|XP_015963242.1| PREDICTED: bZIP transcription factor 16 [Arachis duranensis] gi|1012124399|ref|XP_015963243.1| PREDICTED: bZIP transcription factor 16 [Arachis duranensis]
	CSA013598	gi|944545227|gb|ALL97699.1| bZIP transcription factor 12-1 [Camellia sinensis]
	CSA017740	gi|645265447|ref|XP_008238155.1| PREDICTED: bZIP transcription factor 16 [Prunus mume]
	CSA003423	gi|459021879|gb|AGG39700.1| bZIP transcription factor bZIP8 [Camellia sinensis]
	CSA002325	gi|590700958|ref|XP_007046280.1| BZIP transcription factor family protein isoform 1 [Theobroma cacao] gi|508710215|gb|EOY02112.1| BZIP transcription factor family protein isoform 1 [Theobroma cacao]
	CSA015931	gi|444300788|gb|AGD98703.1| bZIP transcription factor family protein 5 [Camellia sinensis]

## Sheet: HD
	Gene ID	NR Description
NAC	CSA027185	gi|925170155|gb|ALC78994.1| NAC transcription factors 17 [Manihot esculenta] gi|1035918005|gb|OAY47596.1| hypothetical protein MANES_06G090500 [Manihot esculenta] gi|1035918006|gb|OAY47597.1| hypothetical protein MANES_06G090500 [Manihot esculenta]
	CSA010933	gi|925170157|gb|ALC78995.1| NAC transcription factors 18 [Manihot esculenta] gi|1035930606|gb|OAY60192.1| hypothetical protein MANES_01G093200 [Manihot esculenta]
	CSA004675	gi|802783483|ref|XP_012091551.1| PREDICTED: NAC transcription factor 25 isoform X1 [Jatropha curcas] gi|495025571|gb|AGL39685.1| NAC transcription factor 029 [Jatropha curcas] gi|643703859|gb|KDP20923.1| hypothetical protein JCGZ_21394 [Jatropha curcas]
	CSA013449	gi|657980925|ref|XP_008382468.1| PREDICTED: NAC transcription factor 29-like [Malus domestica]
	CSA031084	gi|378405610|gb|AFB82644.1| NAC transcription factor [Camellia sinensis]
	CSA033177	gi|802567082|ref|XP_012067682.1| PREDICTED: NAC transcription factor 29 [Jatropha curcas] gi|495025553|gb|AGL39683.1| NAC transcription factor 027 [Jatropha curcas] gi|643734557|gb|KDP41227.1| hypothetical protein JCGZ_15634 [Jatropha curcas]
	CSA019815	gi|529406735|gb|AGT01909.1| NAC transcription factor [Camellia sinensis]
WRKY	CSA009699	gi|359485613|ref|XP_002269696.2| PREDICTED: probable WRKY transcription factor 31 [Vitis vinifera]
	CSA015399	gi|225466161|ref|XP_002262775.1| PREDICTED: probable WRKY transcription factor 17 [Vitis vinifera] gi|183979106|emb|CAP08302.1| DNA-binding protein [Vitis thunbergii]
	CSA000116	gi|731377844|ref|XP_010658402.1| PREDICTED: WRKY transcription factor 22-like isoform X2 [Vitis vinifera]
	CSA001128	gi|702263881|ref|XP_010038933.1| PREDICTED: probable WRKY transcription factor 21 [Eucalyptus grandis] gi|629120196|gb|KCW84686.1| hypothetical protein EUGRSUZ_B01503 [Eucalyptus grandis]
	CSA019455	gi|225463536|ref|XP_002265612.1| PREDICTED: probable WRKY transcription factor 2 [Vitis vinifera] gi|731433573|ref|XP_010644699.1| PREDICTED: probable WRKY transcription factor 2 [Vitis vinifera] gi|731433575|ref|XP_010644700.1| PREDICTED: probable WRKY transcription factor 2 [Vitis vinifera]
	CSA026670	gi|225447598|ref|XP_002272407.1| PREDICTED: probable WRKY transcription factor 20 isoform X1 [Vitis vinifera] gi|731410093|ref|XP_010657427.1| PREDICTED: probable WRKY transcription factor 20 isoform X1 [Vitis vinifera]
	CSA017015	gi|720063885|ref|XP_010275778.1| PREDICTED: probable WRKY transcription factor 40 [Nelumbo nucifera]
	CSA024124	gi|970002364|ref|XP_015061786.1| PREDICTED: WRKY transcription factor 22-like [Solanum pennellii]
	CSA029390	gi|386686575|gb|AFJ20666.1| WRKY transcription factor 40 [Camellia sinensis]
	CSA017927	gi|387158756|gb|AFJ54352.1| WRKY transcription factor [Camellia sinensis]
	CSA004281	gi|731395672|ref|XP_002270750.3| PREDICTED: probable WRKY transcription factor 65 [Vitis vinifera] gi|297743986|emb|CBI36956.3| unnamed protein product [Vitis vinifera]
	CSA008877	gi|720063885|ref|XP_010275778.1| PREDICTED: probable WRKY transcription factor 40 [Nelumbo nucifera]
	CSA023014	gi|645227462|ref|XP_008220528.1| PREDICTED: probable WRKY transcription factor 50 isoform X2 [Prunus mume]
	CSA030708	gi|719988832|ref|XP_010252466.1| PREDICTED: probable WRKY transcription factor 31 [Nelumbo nucifera]
	CSA028948	gi|387158756|gb|AFJ54352.1| WRKY transcription factor [Camellia sinensis]
	CSA005519	gi|225438803|ref|XP_002283219.1| PREDICTED: probable WRKY transcription factor 7 [Vitis vinifera]
	CSA021419	gi|225444291|ref|XP_002263115.1| PREDICTED: probable WRKY transcription factor 31 [Vitis vinifera]
	CSA035668	gi|225439779|ref|XP_002275978.1| PREDICTED: WRKY transcription factor 44 [Vitis vinifera] gi|731399022|ref|XP_010653470.1| PREDICTED: WRKY transcription factor 44 [Vitis vinifera] gi|731399024|ref|XP_010653471.1| PREDICTED: WRKY transcription factor 44 [Vitis vinifera] gi|731399026|ref|XP_010653472.1| PREDICTED: WRKY transcription factor 44 [Vitis vinifera]
	CSA001788	gi|225423515|ref|XP_002274549.1| PREDICTED: probable WRKY transcription factor 57 [Vitis vinifera]
	CSA001140	gi|720016168|ref|XP_010261070.1| PREDICTED: probable WRKY transcription factor 51 [Nelumbo nucifera]
	CSA033166	gi|590721756|ref|XP_007051705.1| WRKY transcription factor 23, putative [Theobroma cacao] gi|508703966|gb|EOX95862.1| WRKY transcription factor 23, putative [Theobroma cacao]
	CSA020053	gi|720030796|ref|XP_010265617.1| PREDICTED: probable WRKY transcription factor 40 [Nelumbo nucifera]
	CSA005707	gi|731407744|ref|XP_010656605.1| PREDICTED: probable WRKY transcription factor 32 isoform X1 [Vitis vinifera]
	CSA027870	gi|731416983|ref|XP_002270614.2| PREDICTED: probable WRKY transcription factor 74 [Vitis vinifera]
	CSA009535	gi|294861116|gb|ADF45433.1| WRKY1 [Hevea brasiliensis]
	CSA011929	gi|590724039|ref|XP_007052352.1| WRKY family transcription factor [Theobroma cacao] gi|508704613|gb|EOX96509.1| WRKY family transcription factor [Theobroma cacao]
MYB	CSA002022	gi|902573607|gb|AKR80572.1| R3 MYB transcription factor [Vaccinium uliginosum]
	CSA031753	gi|294847482|gb|ADF43752.1| MYB [Camellia sinensis]
	CSA031745	gi|731372885|ref|XP_010651000.1| PREDICTED: putative Myb family transcription factor At1g14600 isoform X1 [Vitis vinifera]
	CSA004892	gi|731434515|ref|XP_010645092.1| PREDICTED: myb family transcription factor APL isoform X1 [Vitis vinifera]
	CSA029288	gi|757114689|emb|CEL26639.1| MYB10 [Ribes nigrum]
	CSA033435	gi|568846614|ref|XP_006477144.1| PREDICTED: transcription factor MYB1R1 [Citrus sinensis]
	CSA019954	gi|110931824|gb|ABH02911.1| MYB transcription factor MYB67 [Glycine max]
	CSA005733	gi|719968261|ref|XP_010264231.1| PREDICTED: transcription factor MYB108-like [Nelumbo nucifera]
	CSA001529	gi|645236279|ref|XP_008224659.1| PREDICTED: myb family transcription factor APL-like isoform X1 [Prunus mume]
	CSA023502	gi|526117848|ref|NP_001268129.1| flavonoid-related R2R3 MYB 4a repressor transcription factor [Vitis vinifera] gi|119220854|gb|ABL61515.1| R2R3 Myb4a C2 repressor motif protein [Vitis vinifera]
	CSA012996	gi|954050148|gb|ALP43794.1| transcription factor MYB4, partial [Vaccinium corymbosum]
	CSA012569	gi|675242690|dbj|BAP39802.1| R2R3 MYB transcription factor [Vitis vinifera]
	CSA002899	gi|868987220|gb|AKP06174.1| MYB6 [Diospyros kaki]
	CSA022687	gi|720020169|ref|XP_010262320.1| PREDICTED: myb-related protein Myb4 [Nelumbo nucifera]
	CSA012418	gi|954050154|gb|ALP43797.1| transcription factor MYB10, partial [Vaccinium corymbosum]
	CSA030968	gi|1009165964|ref|XP_015901330.1| PREDICTED: myb family transcription factor APL [Ziziphus jujuba]
	CSA026317	gi|731434687|ref|XP_010645152.1| PREDICTED: myb-related protein Myb4 [Vitis vinifera]
	CSA010303	gi|751361158|gb|AJF46887.1| Myb-like transcription factor family protein [Camellia sinensis]
	CSA007979	gi|209571357|dbj|BAG75107.1| transcription factor MYB251 [Fagus crenata]
	CSA014712	gi|731392327|ref|XP_010651059.1| PREDICTED: transcription factor MYB59 [Vitis vinifera]
	CSA006029	gi|971569463|ref|XP_015169157.1| PREDICTED: transcription factor MYB1R1-like [Solanum tuberosum]
	CSA036123	gi|566152159|ref|XP_002300173.2| myb family transcription factor family protein [Populus trichocarpa] gi|550348689|gb|EEE84978.2| myb family transcription factor family protein [Populus trichocarpa]
	CSA017943	gi|225457011|ref|XP_002279033.1| PREDICTED: transcription factor MYB98 [Vitis vinifera] gi|297733769|emb|CBI15016.3| unnamed protein product [Vitis vinifera]
	CSA003441	gi|294847482|gb|ADF43752.1| MYB [Camellia sinensis]
	CSA019678	gi|728845485|gb|KHG24928.1| Transcription factor MYB1R1 [Gossypium arboreum]
	CSA020213	gi|225450423|ref|XP_002276091.1| PREDICTED: transcription factor MYB86 [Vitis vinifera]
	CSA034180	gi|198400321|gb|ACH87169.1| MYB transcription factor [Camellia sinensis]
	CSA011129	gi|1009165964|ref|XP_015901330.1| PREDICTED: myb family transcription factor APL [Ziziphus jujuba]
	CSA008995	gi|225468749|ref|XP_002274350.1| PREDICTED: transcription factor MYB1R1 [Vitis vinifera]
	CSA016959	gi|198400321|gb|ACH87169.1| MYB transcription factor [Camellia sinensis]
	CSA034397	gi|1025201400|ref|XP_016477167.1| PREDICTED: transcription factor MYB48-like [Nicotiana tabacum]
	CSA032442	gi|698465412|ref|XP_009782666.1| PREDICTED: myb-related protein 3R-1 [Nicotiana sylvestris]
	CSA016961	gi|198400321|gb|ACH87169.1| MYB transcription factor [Camellia sinensis]
	CSA020441	gi|702274804|ref|XP_010044170.1| PREDICTED: transcription repressor MYB4-like [Eucalyptus grandis] gi|629121717|gb|KCW86207.1| hypothetical protein EUGRSUZ_B02896 [Eucalyptus grandis]
	CSA000032	gi|731419330|ref|XP_002276072.2| PREDICTED: transcription repressor MYB4 [Vitis vinifera]
	CSA027458	gi|747081429|ref|XP_011087987.1| PREDICTED: myb-binding protein 1A-like protein [Sesamum indicum]
	CSA025399	gi|720082948|ref|XP_010242750.1| PREDICTED: myb-like protein X [Nelumbo nucifera]
bZIP	CSA003423	gi|459021879|gb|AGG39700.1| bZIP transcription factor bZIP8 [Camellia sinensis]
	CSA015275	gi|459021235|gb|AGG39691.1| bZIP transcription factor bZIP7 [Camellia sinensis]
	CSA012571	gi|444300790|gb|AGD98704.1| bZIP transcription factor family protein 6 [Camellia sinensis]
	CSA002325	gi|590700958|ref|XP_007046280.1| BZIP transcription factor family protein isoform 1 [Theobroma cacao] gi|508710215|gb|EOY02112.1| BZIP transcription factor family protein isoform 1 [Theobroma cacao]
	CSA015931	gi|444300788|gb|AGD98703.1| bZIP transcription factor family protein 5 [Camellia sinensis]
	CSA008314	gi|398806220|gb|AFP19453.1| bZIP transcription factor family protein 2 [Camellia sinensis]
	CSA015933	gi|444300788|gb|AGD98703.1| bZIP transcription factor family protein 5 [Camellia sinensis]
	CSA025946	gi|512772657|gb|AGO05994.1| bZIP transcription factor family protein 10 [Camellia sinensis]
	CSA005460	gi|444300786|gb|AGD98702.1| bZIP transcription factor family protein 4 [Camellia sinensis]
	CSA026770	gi|1012124395|ref|XP_015963242.1| PREDICTED: bZIP transcription factor 16 [Arachis duranensis] gi|1012124399|ref|XP_015963243.1| PREDICTED: bZIP transcription factor 16 [Arachis duranensis]
	CSA012097	gi|444300786|gb|AGD98702.1| bZIP transcription factor family protein 4 [Camellia sinensis]
	CSA013598	gi|944545227|gb|ALL97699.1| bZIP transcription factor 12-1 [Camellia sinensis]
	CSA017740	gi|645265447|ref|XP_008238155.1| PREDICTED: bZIP transcription factor 16 [Prunus mume]
