# Supplementary material for: Alternative splicing in tea plants was extensively triggered by drought, heat and their combined stresses
Source: PeerJ. 2020 Jan 29;8:e8258. doi: 10.7717/peerj.8258 (PMC6995271; doi:10.7717/peerj.8258)
Supplement: Table S4 [file peerj-08-8258-s009.xlsx]

## Sheet: DT
Table S4 Statistical summary of HSPs that were alternatively spliced (under DT, HT and HD)
Gene ID	NR Description
CSA001150	gi|224099789|ref|XP_002311619.1| heat shock protein 70 [Populus trichocarpa] gi|222851439|gb|EEE88986.1| heat shock protein 70 [Populus trichocarpa]
CSA030713	gi|743905252|ref|XP_011046024.1| PREDICTED: heat shock protein 83 [Populus euphratica]
CSA001574	gi|970011252|ref|XP_015066533.1| PREDICTED: heat shock 70 kDa protein 16 [Solanum pennellii]
CSA023075	gi|802611590|ref|XP_012074575.1| PREDICTED: heat shock 70 kDa protein, mitochondrial [Jatropha curcas] gi|643727564|gb|KDP35950.1| hypothetical protein JCGZ_09922 [Jatropha curcas]
CSA021849	gi|224098390|ref|XP_002311161.1| heat shock protein 70 [Populus trichocarpa] gi|222850981|gb|EEE88528.1| heat shock protein 70 [Populus trichocarpa]
CSA001312	gi|590579281|ref|XP_007013743.1| DNAJ heat shock family protein [Theobroma cacao] gi|508784106|gb|EOY31362.1| DNAJ heat shock family protein [Theobroma cacao]
CSA011619	gi|747042896|ref|XP_011080863.1| PREDICTED: heat shock 70 kDa protein 14-like [Sesamum indicum]
CSA011817	gi|657994927|ref|XP_008389779.1| PREDICTED: small heat shock protein, chloroplastic-like [Malus domestica]
CSA031584	gi|743905252|ref|XP_011046024.1| PREDICTED: heat shock protein 83 [Populus euphratica]
CSA026073	gi|225456004|ref|XP_002279101.1| PREDICTED: stromal 70 kDa heat shock-related protein, chloroplastic [Vitis vinifera]
CSA006518	gi|590657227|ref|XP_007034504.1| Heat shock protein 60 isoform 1 [Theobroma cacao] gi|508713533|gb|EOY05430.1| Heat shock protein 60 isoform 1 [Theobroma cacao]
CSA008954	gi|590579281|ref|XP_007013743.1| DNAJ heat shock family protein [Theobroma cacao] gi|508784106|gb|EOY31362.1| DNAJ heat shock family protein [Theobroma cacao]
CSA026186	gi|697192120|ref|XP_009605137.1| PREDICTED: heat shock protein 83 [Nicotiana tomentosiformis] gi|1025038651|ref|XP_016444557.1| PREDICTED: heat shock protein 90-6, mitochondrial-like [Nicotiana tabacum]
CSA001575	gi|1025410814|ref|XP_016439500.1| PREDICTED: heat shock 70 kDa protein 16-like [Nicotiana tabacum]

## Sheet: HT
Gene ID	NR Description
CSA030713	gi|743905252|ref|XP_011046024.1| PREDICTED: heat shock protein 83 [Populus euphratica]
CSA016270	gi|1024047173|gb|KZV48642.1| heat shock protein [Dorcoceras hygrometricum]
CSA001574	gi|970011252|ref|XP_015066533.1| PREDICTED: heat shock 70 kDa protein 16 [Solanum pennellii]
CSA010005	gi|747042896|ref|XP_011080863.1| PREDICTED: heat shock 70 kDa protein 14-like [Sesamum indicum]
CSA032421	gi|908373662|gb|AKT44363.1| heat shock protein 1 [Tectona grandis]
CSA023075	gi|802611590|ref|XP_012074575.1| PREDICTED: heat shock 70 kDa protein, mitochondrial [Jatropha curcas] gi|643727564|gb|KDP35950.1| hypothetical protein JCGZ_09922 [Jatropha curcas]
CSA026186	gi|697192120|ref|XP_009605137.1| PREDICTED: heat shock protein 83 [Nicotiana tomentosiformis] gi|1025038651|ref|XP_016444557.1| PREDICTED: heat shock protein 90-6, mitochondrial-like [Nicotiana tabacum]
CSA011817	gi|657994927|ref|XP_008389779.1| PREDICTED: small heat shock protein, chloroplastic-like [Malus domestica]
CSA026073	gi|225456004|ref|XP_002279101.1| PREDICTED: stromal 70 kDa heat shock-related protein, chloroplastic [Vitis vinifera]
CSA027456	gi|747081421|ref|XP_011087983.1| PREDICTED: heat shock 70 kDa protein, mitochondrial-like [Sesamum indicum]
CSA027555	gi|731352584|ref|XP_010687621.1| PREDICTED: heat shock 70 kDa protein-like [Beta vulgaris subsp. vulgaris]
CSA008954	gi|590579281|ref|XP_007013743.1| DNAJ heat shock family protein [Theobroma cacao] gi|508784106|gb|EOY31362.1| DNAJ heat shock family protein [Theobroma cacao]
CSA021849	gi|224098390|ref|XP_002311161.1| heat shock protein 70 [Populus trichocarpa] gi|222850981|gb|EEE88528.1| heat shock protein 70 [Populus trichocarpa]
CSA011619	gi|747042896|ref|XP_011080863.1| PREDICTED: heat shock 70 kDa protein 14-like [Sesamum indicum]
CSA001575	gi|1025410814|ref|XP_016439500.1| PREDICTED: heat shock 70 kDa protein 16-like [Nicotiana tabacum]

## Sheet: HD
Gene ID	NR Description
CSA010005	gi|747042896|ref|XP_011080863.1| PREDICTED: heat shock 70 kDa protein 14-like [Sesamum indicum]
CSA020299	gi|224114609|ref|XP_002316809.1| heat shock transcription factor family protein [Populus trichocarpa] gi|222859874|gb|EEE97421.1| heat shock transcription factor family protein [Populus trichocarpa]
CSA013547	gi|1009107646|ref|XP_015880753.1| PREDICTED: heat shock cognate protein 80 [Ziziphus jujuba]
CSA030713	gi|743905252|ref|XP_011046024.1| PREDICTED: heat shock protein 83 [Populus euphratica]
CSA008955	gi|590579281|ref|XP_007013743.1| DNAJ heat shock family protein [Theobroma cacao] gi|508784106|gb|EOY31362.1| DNAJ heat shock family protein [Theobroma cacao]
CSA026073	gi|225456004|ref|XP_002279101.1| PREDICTED: stromal 70 kDa heat shock-related protein, chloroplastic [Vitis vinifera]
CSA006518	gi|590657227|ref|XP_007034504.1| Heat shock protein 60 isoform 1 [Theobroma cacao] gi|508713533|gb|EOY05430.1| Heat shock protein 60 isoform 1 [Theobroma cacao]
CSA016270	gi|1024047173|gb|KZV48642.1| heat shock protein [Dorcoceras hygrometricum]
CSA023075	gi|802611590|ref|XP_012074575.1| PREDICTED: heat shock 70 kDa protein, mitochondrial [Jatropha curcas] gi|643727564|gb|KDP35950.1| hypothetical protein JCGZ_09922 [Jatropha curcas]
CSA012230	gi|470109538|ref|XP_004291051.1| PREDICTED: heat shock factor protein HSF30 isoform X1 [Fragaria vesca subsp. vesca]
CSA000306	gi|802547264|ref|XP_012089411.1| PREDICTED: LOW QUALITY PROTEIN: heat shock cognate 70 kDa protein 2-like [Jatropha curcas]
CSA008954	gi|590579281|ref|XP_007013743.1| DNAJ heat shock family protein [Theobroma cacao] gi|508784106|gb|EOY31362.1| DNAJ heat shock family protein [Theobroma cacao]
CSA016462	gi|189380223|gb|ACD93209.1| heat shock protein 70 [Camellia sinensis]
CSA021849	gi|224098390|ref|XP_002311161.1| heat shock protein 70 [Populus trichocarpa] gi|222850981|gb|EEE88528.1| heat shock protein 70 [Populus trichocarpa]
CSA001312	gi|590579281|ref|XP_007013743.1| DNAJ heat shock family protein [Theobroma cacao] gi|508784106|gb|EOY31362.1| DNAJ heat shock family protein [Theobroma cacao]
CSA011619	gi|747042896|ref|XP_011080863.1| PREDICTED: heat shock 70 kDa protein 14-like [Sesamum indicum]
CSA026186	gi|697192120|ref|XP_009605137.1| PREDICTED: heat shock protein 83 [Nicotiana tomentosiformis] gi|1025038651|ref|XP_016444557.1| PREDICTED: heat shock protein 90-6, mitochondrial-like [Nicotiana tabacum]
CSA013811	gi|1009107646|ref|XP_015880753.1| PREDICTED: heat shock cognate protein 80 [Ziziphus jujuba]
CSA001575	gi|1025410814|ref|XP_016439500.1| PREDICTED: heat shock 70 kDa protein 16-like [Nicotiana tabacum]
CSA011817	gi|657994927|ref|XP_008389779.1| PREDICTED: small heat shock protein, chloroplastic-like [Malus domestica]
