# Supplementary material for: Alternative splicing in tea plants was extensively triggered by drought, heat and their combined stresses
Source: PeerJ. 2020 Jan 29;8:e8258. doi: 10.7717/peerj.8258 (PMC6995271; doi:10.7717/peerj.8258)
Supplement: Table S5 [file peerj-08-8258-s010.xlsx]

## Sheet: DT 
Table S5 Statistical summary of GO terms that enriched in DEG-specific, DSG-specific and DEG-DSG overlapped genes (under DT, HT and HD)
	Catergory	GO_Term	Corrected P-value	Cluster frequency
DT DEG-specific	cellular_component	GO:0009579 thylakoid	2.17e-13	90 out of 3417 genes, 2.6%
	cellular_component	GO:0034357 photosynthetic membrane	4.45e-10	66 out of 3417 genes, 1.9%
	cellular_component	GO:0009507 chloroplast	9.59e-10	236 out of 3417 genes, 6.9%
	cellular_component	GO:0042651 thylakoid membrane	2.26e-09	58 out of 3417 genes, 1.7%
	cellular_component	GO:0009534 chloroplast thylakoid	4.82e-09	59 out of 3417 genes, 1.7%
	cellular_component	GO:0009536 plastid	6.46e-09	247 out of 3417 genes, 7.2%
	cellular_component	GO:0031976 plastid thylakoid	6.65e-09	59 out of 3417 genes, 1.7%
	cellular_component	GO:0044436 thylakoid part	7.07e-09	67 out of 3417 genes, 2.0%
	cellular_component	GO:0044435 plastid part	4.63e-08	129 out of 3417 genes, 3.8%
	cellular_component	GO:0044434 chloroplast part	1.72e-07	125 out of 3417 genes, 3.7%
	cellular_component	GO:0009535 chloroplast thylakoid membrane	8.41e-07	46 out of 3417 genes, 1.3%
	cellular_component	GO:0055035 plastid thylakoid membrane	1.16e-06	46 out of 3417 genes, 1.3%
	cellular_component	GO:0031984 organelle subcompartment	1.49e-06	86 out of 3417 genes, 2.5%
	cellular_component	GO:0044444 cytoplasmic part	5.19e-06	719 out of 3417 genes, 21.0%
	cellular_component	GO:0005737 cytoplasm	1.03e-05	875 out of 3417 genes, 25.6%
	cellular_component	GO:0098796 membrane protein complex	7.37e-05	48 out of 3417 genes, 1.4%
	cellular_component	GO:0009521 photosystem	0.00072	117 out of 3417 genes, 3.4%
	cellular_component	GO:0009941 chloroplast envelope	0.01029	28 out of 3417 genes, 0.8%
	cellular_component	GO:0009526 plastid envelope	0.01171	17 out of 3417 genes, 0.5%
	cellular_component	GO:0009522 photosystem I	0.03668	20 out of 3417 genes, 0.6%
	biological_process	GO:0015979 photosynthesis	2.83e-05	52 out of 3417 genes, 1.5%
	biological_process	GO:0006779 porphyrin-containing compound biosynthetic process	0.00103	54 out of 3417 genes, 1.6%
	biological_process	GO:0006778 porphyrin-containing compound metabolic process	0.01026	15 out of 3417 genes, 0.4%
	biological_process	GO:0005996 monosaccharide metabolic process	0.03087	54 out of 3417 genes, 1.6%
	molecular_function	GO:0016168 chlorophyll binding	0.01643	16 out of 3417 genes, 0.5%
DT DSG-specific	biological_process	GO:0016070 RNA metabolic process	3.03e-06	284 out of 4214 genes, 6.7%
	biological_process	GO:0006996 organelle organization	4.62e-05	222 out of 4214 genes, 5.3%
	biological_process	GO:0006396 RNA processing	4.67e-05	143 out of 4214 genes, 3.4%
	biological_process	GO:0051276 chromosome organization	0.00086	88 out of 4214 genes, 2.1%
	biological_process	GO:0006139 nucleobase-containing compound metabolic process	0.00101	514 out of 4214 genes, 12.2%
	cellular_component	GO:0005634 nucleus	0.00123	464 out of 4214 genes, 11.0%
	biological_process	GO:0090304 nucleic acid metabolic process	0.00137	412 out of 4214 genes, 9.8%
	biological_process	GO:0032508 DNA duplex unwinding	0.00138	19 out of 4214 genes, 0.5%
	biological_process	GO:0032392 DNA geometric change	0.00138	19 out of 4214 genes, 0.5%
	biological_process	GO:1901360 organic cyclic compound metabolic process	0.00143	590 out of 4214 genes, 14.0%
	molecular_function	GO:0016462 pyrophosphatase activity	0.00144	273 out of 4214 genes, 6.5%
	molecular_function	GO:0016818 hydrolase activity, acting on acid anhydrides, in phosphorus-containing anhydrides	0.0016	275 out of 4214 genes, 6.5%
	molecular_function	GO:0017111 nucleoside-triphosphatase activity	0.00194	266 out of 4214 genes, 6.3%
	molecular_function	GO:0016817 hydrolase activity, acting on acid anhydrides	0.00207	277 out of 4214 genes, 6.6%
	biological_process	GO:0006725 cellular aromatic compound metabolic process	0.00269	571 out of 4214 genes, 13.6%
	molecular_function	GO:0003678 DNA helicase activity	0.00347	18 out of 4214 genes, 0.4%
	molecular_function	GO:0016787 hydrolase activity	0.00693	819 out of 4214 genes, 19.4%
	biological_process	GO:0046483 heterocycle metabolic process	0.00702	550 out of 4214 genes, 13.1%
	cellular_component	GO:0044428 nuclear part	0.00795	161 out of 4214 genes, 3.8%
	biological_process	GO:0071103 DNA conformation change	0.01635	35 out of 4214 genes, 0.8%
	molecular_function	GO:0004386 helicase activity	0.02002	65 out of 4214 genes, 1.5%
	biological_process	GO:0044238 primary metabolic process	0.02699	1621 out of 4214 genes, 38.5%
	cellular_component	GO:0005829 cytosol	0.02701	188 out of 4214 genes, 4.5%
	biological_process	GO:0071704 organic substance metabolic process	0.03475	1722 out of 4214 genes, 40.9%
	cellular_component	GO:0000793 condensed chromosome	0.04093	16 out of 4214 genes, 0.4%
	molecular_function	GO:0008094 DNA-dependent ATPase activity	0.044	23 out of 4214 genes, 0.5%
DT DEG-DSG overlapped	cellular_component	GO:0009507 chloroplast	1.52e-15	256 out of 3186 genes, 8.0%
	cellular_component	GO:0009536 plastid	7.13e-15	139 out of 3186 genes, 4.4%
	cellular_component	GO:0044435 plastid part	5.43e-14	135 out of 3186 genes, 4.2%
	cellular_component	GO:0044434 chloroplast part	2.81e-13	71 out of 3186 genes, 2.2%
	cellular_component	GO:0009532 plastid stroma	2.28e-08	67 out of 3186 genes, 2.1%
	cellular_component	GO:0009570 chloroplast stroma	3.19e-07	1294 out of 3186 genes, 40.6%
	cellular_component	GO:0009579 thylakoid	4.21e-06	70 out of 3186 genes, 2.2%
	cellular_component	GO:0009526 plastid envelope	6.81e-06	60 out of 3186 genes, 1.9%
	cellular_component	GO:0009941 chloroplast envelope	1.4e-05	57 out of 3186 genes, 1.8%
	cellular_component	GO:0044436 thylakoid part	0.00224	1762 out of 3186 genes, 55.3%
	cellular_component	GO:0031977 thylakoid lumen	0.01359	738 out of 3186 genes, 23.2%
	cellular_component	GO:0009521 photosystem	0.0192	51 out of 3186 genes, 1.6%
	biological_process	GO:0015979 photosynthesis	0.03269	11 out of 3186 genes, 0.3%
	biological_process	GO:0044699 single-organism process	1.56e-06	24 out of 3186 genes, 0.8%
	biological_process	GO:0044710 single-organism metabolic process	0.00074	39 out of 3186 genes, 1.2%
	molecular_function	GO:0003824 catalytic activity	0.00021

## Sheet: HT
	Catergory	GO_Term	Corrected P-value	Cluster frequency
HT DEG-specific	molecular_function	GO:0046914 transition metal ion binding	8.03e-11	217 out of 1638 genes, 13.2%
	molecular_function	GO:0008270 zinc ion binding	1.18e-09	156 out of 1638 genes, 9.5%
	molecular_function	GO:0043169 cation binding	5.43e-09	347 out of 1638 genes, 21.2%
	molecular_function	GO:0046872 metal ion binding	8.93e-09	344 out of 1638 genes, 21.0%
	cellular_component	GO:0009523 photosystem II	0.00282	11 out of 1638 genes, 0.7%
	molecular_function	GO:0043167 ion binding	0.00352	581 out of 1638 genes, 35.5%
	cellular_component	GO:0009521 photosystem	0.00465	17 out of 1638 genes, 1.0%
	cellular_component	GO:0009579 thylakoid	0.02007	36 out of 1638 genes, 2.2%
HT DSG-specific	cellular_component	GO:0044464 cell part	4.06e-07	393 out of 5973 genes, 6.6%
	cellular_component	GO:0005623 cell	1e-06	2425 out of 5973 genes, 40.6%
	cellular_component	GO:0005622 intracellular	1.11e-06	2443 out of 5973 genes, 40.9%
	cellular_component	GO:0044424 intracellular part	0.00024	2158 out of 5973 genes, 36.1%
	cellular_component	GO:0043234 protein complex	0.00088	807 out of 5973 genes, 13.5%
	cellular_component	GO:0005829 cytosol	0.00236	294 out of 5973 genes, 4.9%
	cellular_component	GO:0044428 nuclear part	0.00748	2008 out of 5973 genes, 33.6%
	cellular_component	GO:0005634 nucleus	0.01006	2291 out of 5973 genes, 38.4%
	cellular_component	GO:0012505 endomembrane system	0.01388	482 out of 5973 genes, 8.1%
	cellular_component	GO:1990234 transferase complex	0.01564	736 out of 5973 genes, 12.3%
	cellular_component	GO:0044422 organelle part	0.03131	736 out of 5973 genes, 12.3%
	cellular_component	GO:0044446 intracellular organelle part	0.03249	1142 out of 5973 genes, 19.1%
	cellular_component	GO:0043231 intracellular membrane-bounded organelle	0.04186	3146 out of 5973 genes, 52.7%
	cellular_component	GO:0043227 membrane-bounded organelle	0.04225	113 out of 5973 genes, 1.9%
	biological_process	GO:0016070 RNA metabolic process	6.04e-09	261 out of 5973 genes, 4.4%
	biological_process	GO:0043412 macromolecule modification	4.16e-06	179 out of 5973 genes, 3.0%
	biological_process	GO:0006996 organelle organization	8.67e-05	45 out of 5973 genes, 0.8%
	biological_process	GO:0044238 primary metabolic process	0.00042	695 out of 5973 genes, 11.6%
	biological_process	GO:0006464 cellular protein modification process	0.00133	216 out of 5973 genes, 3.6%
	biological_process	GO:0036211 protein modification process	0.00133	626 out of 5973 genes, 10.5%
	molecular_function	GO:0016787 hydrolase activity	0.00137	133 out of 5973 genes, 2.2%
	biological_process	GO:0009987 cellular process	0.00151	2415 out of 5973 genes, 40.4%
	biological_process	GO:0051276 chromosome organization	0.00164	703 out of 5973 genes, 11.8%
	biological_process	GO:0006396 RNA processing	0.00356	1681 out of 5973 genes, 28.1%
	biological_process	GO:0071103 DNA conformation change	0.00496	1523 out of 5973 genes, 25.5%
	biological_process	GO:0006139 nucleobase-containing compound metabolic process	0.00678	341 out of 5973 genes, 5.7%
	biological_process	GO:0034660 ncRNA metabolic process	0.01072	783 out of 5973 genes, 13.1%
	biological_process	GO:0071704 organic substance metabolic process	0.01187	113 out of 5973 genes, 1.9%
	biological_process	GO:0050794 regulation of cellular process	0.01258	751 out of 5973 genes, 12.6%
	biological_process	GO:0044763 single-organism cellular process	0.0127	852 out of 5973 genes, 14.3%
	biological_process	GO:0044260 cellular macromolecule metabolic process	0.01352	1707 out of 5973 genes, 28.6%
	biological_process	GO:0050789 regulation of biological process	0.01501	1299 out of 5973 genes, 21.7%
	biological_process	GO:0046483 heterocycle metabolic process	0.01773	550 out of 5973 genes, 9.2%
	biological_process	GO:0065007 biological regulation	0.0179	773 out of 5973 genes, 12.9%
	biological_process	GO:0043170 macromolecule metabolic process	0.01801	752 out of 5973 genes, 12.6%
	biological_process	GO:0090304 nucleic acid metabolic process	0.02448	750 out of 5973 genes, 12.6%
	biological_process	GO:0006725 cellular aromatic compound metabolic process	0.02679	49 out of 5973 genes, 0.8%
	biological_process	GO:0044237 cellular metabolic process	0.03796	2244 out of 5973 genes, 37.6%
	biological_process	GO:0051716 cellular response to stimulus	0.04404	1405 out of 5973 genes, 23.5%
	molecular_function	GO:0036094 small molecule binding	0.01944	1407 out of 5973 genes, 23.6%
	molecular_function	GO:0015631 tubulin binding	0.0363	375 out of 5973 genes, 6.3%

## Sheet: HD 
	Catergory	GO_Term	Corrected P-value	Cluster frequency
HD DEG-specific	cellular_component	GO:0009521 photosystem	0.00191	12 out of 803 genes, 1.5%
	cellular_component	GO:0009579 thylakoid	0.00642	34 out of 803 genes, 4.2%
	cellular_component	GO:0044436 thylakoid part	0.03487	23 out of 803 genes, 2.9%
	cellular_component	GO:0034357 photosynthetic membrane	0.04203	161 out of 803 genes, 20.0%
	molecular_function	GO:0046906 tetrapyrrole binding	0.00212	25 out of 803 genes, 3.1%
	molecular_function	GO:0046872 metal ion binding	0.02494	18 out of 803 genes, 2.2%
	molecular_function	GO:0004497 monooxygenase activity	0.03406	161 out of 803 genes, 20.0%
	molecular_function	GO:0043169 cation binding	0.03498	29 out of 803 genes, 3.6%
	molecular_function	GO:0020037 heme binding	0.04021	17 out of 803 genes, 2.1%
HD DSG-specific	cellular_component	GO:0005622 intracellular	2.09e-14	2891 out of 7902 genes, 36.6%
	cellular_component	GO:0044424 intracellular part	5.88e-13	2718 out of 7902 genes, 34.4%
	cellular_component	GO:0044464 cell part	1.22e-10	506 out of 7902 genes, 6.4%
	cellular_component	GO:0005623 cell	6.79e-10	399 out of 7902 genes, 5.0%
	cellular_component	GO:0005737 cytoplasm	1.14e-09	3201 out of 7902 genes, 40.5%
	cellular_component	GO:0044444 cytoplasmic part	2.48e-09	3223 out of 7902 genes, 40.8%
	cellular_component	GO:0043227 membrane-bounded organelle	7.63e-09	1943 out of 7902 genes, 24.6%
	cellular_component	GO:0043231 intracellular membrane-bounded organelle	1.28e-08	1579 out of 7902 genes, 20.0%
	cellular_component	GO:0012505 endomembrane system	4.76e-08	1920 out of 7902 genes, 24.3%
	cellular_component	GO:0043226 organelle	6.01e-08	1915 out of 7902 genes, 24.2%
	cellular_component	GO:0043229 intracellular organelle	1.21e-07	472 out of 7902 genes, 6.0%
	cellular_component	GO:0044422 organelle part	3e-07	2168 out of 7902 genes, 27.4%
	cellular_component	GO:0044446 intracellular organelle part	6.11e-07	1050 out of 7902 genes, 13.3%
	cellular_component	GO:0005829 cytosol	3.72e-05	2158 out of 7902 genes, 27.3%
	cellular_component	GO:0098588 bounding membrane of organelle	7.88e-05	1025 out of 7902 genes, 13.0%
	cellular_component	GO:0005634 nucleus	0.00021	1020 out of 7902 genes, 12.9%
	cellular_component	GO:0043234 protein complex	0.00028	971 out of 7902 genes, 12.3%
	cellular_component	GO:0044431 Golgi apparatus part	0.00136	971 out of 7902 genes, 12.3%
	cellular_component	GO:0044428 nuclear part	0.00667	237 out of 7902 genes, 3.0%
	cellular_component	GO:0031090 organelle membrane	0.00781	3011 out of 7902 genes, 38.1%
	biological_process	GO:0016070 RNA metabolic process	1.5e-11	719 out of 7902 genes, 9.1%
	biological_process	GO:0006996 organelle organization	1.21e-10	342 out of 7902 genes, 4.3%
	biological_process	GO:0043412 macromolecule modification	7.64e-08	645 out of 7902 genes, 8.2%
	biological_process	GO:0036211 protein modification process	4.43e-06	177 out of 7902 genes, 2.2%
	biological_process	GO:0006464 cellular protein modification process	4.43e-06	281 out of 7902 genes, 3.6%
	biological_process	GO:0006396 RNA processing	6.12e-06	4142 out of 7902 genes, 52.4%
	biological_process	GO:0044238 primary metabolic process	1.62e-05	672 out of 7902 genes, 8.5%
	biological_process	GO:0071840 cellular component organization or biogenesis	2.52e-05	3191 out of 7902 genes, 40.4%
	biological_process	GO:0016043 cellular component organization	4.49e-05	202 out of 7902 genes, 2.6%
	biological_process	GO:0016311 dephosphorylation	7.4e-05	174 out of 7902 genes, 2.2%
	biological_process	GO:0009987 cellular process	8.58e-05	825 out of 7902 genes, 10.4%
	biological_process	GO:0010467 gene expression	9.72e-05	296 out of 7902 genes, 3.7%
	biological_process	GO:0071704 organic substance metabolic process	0.00012	622 out of 7902 genes, 7.9%
	biological_process	GO:0051641 cellular localization	0.00027	2253 out of 7902 genes, 28.5%
	biological_process	GO:0043170 macromolecule metabolic process	0.00029	2007 out of 7902 genes, 25.4%
	biological_process	GO:0044260 cellular macromolecule metabolic process	0.00032	198 out of 7902 genes, 2.5%
	biological_process	GO:1902589 single-organism organelle organization	0.00053	171 out of 7902 genes, 2.2%
	biological_process	GO:0034660 ncRNA metabolic process	0.0007	106 out of 7902 genes, 1.3%
	biological_process	GO:0006470 protein dephosphorylation	0.00071	264 out of 7902 genes, 3.3%
	biological_process	GO:0046907 intracellular transport	0.00097	267 out of 7902 genes, 3.4%
	biological_process	GO:0051649 establishment of localization in cell	0.00118	1519 out of 7902 genes, 19.2%
	biological_process	GO:0019538 protein metabolic process	0.00119	135 out of 7902 genes, 1.7%
	biological_process	GO:0050789 regulation of biological process	0.00211	134 out of 7902 genes, 1.7%
	biological_process	GO:0044267 cellular protein metabolic process	0.00219	1022 out of 7902 genes, 12.9%
	biological_process	GO:0034613 cellular protein localization	0.00239	1337 out of 7902 genes, 16.9%
	biological_process	GO:0065007 biological regulation	0.00717	216 out of 7902 genes, 2.7%
	biological_process	GO:0051128 regulation of cellular component organization	0.00985	108 out of 7902 genes, 1.4%
	biological_process	GO:0070727 cellular macromolecule localization	0.01108	274 out of 7902 genes, 3.5%
	biological_process	GO:0048518 positive regulation of biological process	0.01193	1108 out of 7902 genes, 14.0%
	biological_process	GO:0070647 protein modification by small protein conjugation or removal	0.01306	346 out of 7902 genes, 4.4%
	biological_process	GO:1902582 single-organism intracellular transport	0.01773	376 out of 7902 genes, 4.8%
	biological_process	GO:0033043 regulation of organelle organization	0.0233	89 out of 7902 genes, 1.1%
	biological_process	GO:0044237 cellular metabolic process	0.02791	217 out of 7902 genes, 2.7%
	biological_process	GO:0050794 regulation of cellular process	0.02795	161 out of 7902 genes, 2.0%
	molecular_function	GO:0016779 nucleotidyltransferase activity	0.02987	170 out of 7902 genes, 2.2%
	biological_process	GO:0050793 regulation of developmental process	0.03331	185 out of 7902 genes, 2.3%
	biological_process	GO:0022607 cellular component assembly	0.03934	61 out of 7902 genes, 0.8%
	biological_process	GO:0018193 peptidyl-amino acid modification	0.03951	2939 out of 7902 genes, 37.2%
	biological_process	GO:0010154 fruit development	0.04315	904 out of 7902 genes, 11.4%
	biological_process	GO:0051276 chromosome organization	0.04317	125 out of 7902 genes, 1.6%
	biological_process	GO:0034470 ncRNA processing	0.04794	1464 out of 7902 genes, 18.5%
	molecular_function	GO:0042578 phosphoric ester hydrolase activity	0.00014	116 out of 7902 genes, 1.5%
	molecular_function	GO:0016791 phosphatase activity	0.00015	79 out of 7902 genes, 1.0%
	molecular_function	GO:0044877 macromolecular complex binding	0.00194	203 out of 7902 genes, 2.6%
	molecular_function	GO:0004721 phosphoprotein phosphatase activity	0.00295	139 out of 7902 genes, 1.8%
	molecular_function	GO:0016788 hydrolase activity, acting on ester bonds	0.00846	74 out of 7902 genes, 0.9%
	biological_process	GO:0009893 positive regulation of metabolic process	0.02873	134 out of 7902 genes, 1.7%
	molecular_function	GO:0016787 hydrolase activity	0.02946	121 out of 7902 genes, 1.5%
HD DEG-DSG overlapped	molecular_function	GO:0003824 catalytic activity	0.00198	557 out of 957 genes, 58.2%
	molecular_function	GO:0016491 oxidoreductase activity	0.02968	124 out of 957 genes, 13.0%
