# Supplementary material for: Alternative splicing in tea plants was extensively triggered by drought, heat and their combined stresses
Source: PeerJ. 2020 Jan 29;8:e8258. doi: 10.7717/peerj.8258 (PMC6995271; doi:10.7717/peerj.8258)
Supplement: Table S6 [file peerj-08-8258-s011.xlsx]

## Sheet: DT 
Table S6 Statistical summary of KEGG pathways that enriched in DEG-specific, DSG-specific and DEG-DSG overlapped genes (under DT, HT and HD)
	KEGG_A_class	KEGG_B_class	Pathway	out (865)	All (3966)	Pvalue	Qvalue
DT DEG-specific	Metabolism	Carbohydrate metabolism	Glyoxylate and dicarboxylate metabolism	30	63	4.3e-06	0.000379233
	Metabolism	Energy metabolism	Photosynthesis	26	52	6.12e-06	0.000379233
	Genetic Information Processing	Folding, sorting and degradation	Protein processing in endoplasmic reticulum	63	176	9.83e-06	0.000406377
	Metabolism	Amino acid metabolism	Glycine, serine and threonine metabolism	27	60	4.65e-05	0.00144274
	Metabolism	Energy metabolism	Photosynthesis - antenna proteins	10	16	0.000507494	0.0107191
	Metabolism	Global and Overview	Carbon metabolism	67	214	0.000571922	0.0107191
	Metabolism	Biosynthesis of other secondary metabolites	Flavone and flavonol biosynthesis	6	7	0.000605112	0.0107191
	Metabolism	Metabolism of other amino acids	Glutathione metabolism	28	74	0.00114262	0.0177106
	Metabolism	Metabolism of cofactors and vitamins	Porphyrin and chlorophyll metabolism	17	41	0.0034967	0.0481767
	Cellular Processes	Transport and catabolism	Peroxisome	24	67	0.00573806	0.0711519
	Metabolism	Lipid metabolism	alpha-Linolenic acid metabolism	14	34	0.00837889	0.0931895
	Human Diseases	Endocrine and metabolic diseases	Insulin resistance	18	48	0.00935867	0.0931895
	Metabolism	Global and Overview	Biosynthesis of amino acids	54	185	0.00976986	0.0931895
	Genetic Information Processing	Folding, sorting and degradation	Proteasome	19	54	0.0162379	0.135868
	Metabolism	Energy metabolism	Carbon fixation in photosynthetic organisms	22	65	0.0164356	0.135868
	Cellular Processes	Transport and catabolism	Phagosome	25	77	0.0189987	0.14724
	Metabolism	Amino acid metabolism	Cysteine and methionine metabolism	25	78	0.0223609	0.163103
	Metabolism	Amino acid metabolism	Arginine and proline metabolism	17	49	0.0257201	0.177183
	Metabolism	Carbohydrate metabolism	Amino sugar and nucleotide sugar metabolism	32	107	0.0294619	0.188168
	Metabolism	Energy metabolism	Sulfur metabolism	10	25	0.0303496	0.188168
	Metabolism	Metabolism of terpenoids and polyketides	Zeatin biosynthesis	9	23	0.0451261	0.254771
	Metabolism	Metabolism of terpenoids and polyketides	Carotenoid biosynthesis	11	30	0.0452012	0.254771
DT DSG-specific	Metabolism	Glycan biosynthesis and metabolism	Glycosylphosphatidylinositol(GPI)-anchor biosynthesis	14	20	1.06681e-05	0.00131217
	Metabolism	Nucleotide metabolism	Pyrimidine metabolism	36	103	0.00389456	0.0772105
	Metabolism	Carbohydrate metabolism	Propanoate metabolism	13	31	0.0150478	0.205653
	Metabolism	Metabolism of cofactors and vitamins	Pantothenate and CoA biosynthesis	10	24	0.033058	0.406614
	Metabolism	Amino acid metabolism	Histidine metabolism	8	18	0.0369911	0.413628
	Genetic Information Processing	Transcription	Spliceosome	58	158	5.88058e-05	0.00361656
	Genetic Information Processing	Translation	mRNA surveillance pathway	37	98	0.000692967	0.0284116
	Genetic Information Processing	Translation	RNA transport	47	142	0.00369787	0.0772105
	Genetic Information Processing	Translation	Ribosome biogenesis in eukaryotes	26	69	0.0043157	0.0772105
	Genetic Information Processing	Transcription	Basal transcription factors	19	46	0.00439409	0.0772105
	Genetic Information Processing	Replication and repair	DNA replication	17	44	0.0147297	0.205653
	Genetic Information Processing	Transcription	RNA polymerase	13	35	0.0429283	0.440016
DT DEG-DSG overlapped	Metabolism	Global and Overview	Carbon metabolism	58	214	0.000512548	0.0640685
	Metabolism	Amino acid metabolism	Arginine biosynthesis	12	31	0.0054359	0.153115
	Metabolism	Global and Overview	2-Oxocarboxylic acid metabolism	16	47	0.00626147	0.153115
	Metabolism	Energy metabolism	Nitrogen metabolism	10	25	0.00837071	0.153115
	Metabolism	Energy metabolism	Carbon fixation in photosynthetic organisms	20	65	0.00857446	0.153115
	Metabolism	Glycan biosynthesis and metabolism	Other glycan degradation	7	15	0.0102762	0.160565
	Metabolism	Amino acid metabolism	Alanine, aspartate and glutamate metabolism	14	42	0.0125455	0.174243
	Metabolism	Global and Overview	Biosynthesis of amino acids	45	185	0.0177044	0.201187
	Metabolism	Glycan biosynthesis and metabolism	Glycosphingolipid biosynthesis - ganglio series	3	4	0.0203715	0.212203
	Metabolism	Amino acid metabolism	Arginine and proline metabolism	15	49	0.0223711	0.215107
	Metabolism	Carbohydrate metabolism	Inositol phosphate metabolism	15	50	0.0268043	0.239324
	Metabolism	Carbohydrate metabolism	Galactose metabolism	14	47	0.0337433	0.263619
	Metabolism	Metabolism of cofactors and vitamins	One carbon pool by folate	7	19	0.0415738	0.29645
	Metabolism	Metabolism of terpenoids and polyketides	Monoterpenoid biosynthesis	3	5	0.0441173	0.29645
	Metabolism	Amino acid metabolism	Valine, leucine and isoleucine degradation	12	40	0.0450605	0.29645
	Metabolism	Carbohydrate metabolism	Glycolysis / Gluconeogenesis	24	95	0.0480842	0.300526
	Environmental Information Processing	Membrane transport	ABC transporters	14	36	0.00260442	0.108517
	Environmental Information Processing	Signal transduction	Phosphatidylinositol signaling system	15	47	0.015184	0.1898
	Genetic Information Processing	Translation	Aminoacyl-tRNA biosynthesis	17	46	0.00180946	0.108517
	Genetic Information Processing	Replication and repair	Base excision repair	12	38	0.030829	0.256909

## Sheet: HT 
	KEGG_A_class	KEGG_B_class	Pathway	out (389)	All (3966)	Pvalue	Qvalue
HT DEG-specific	Metabolism	Energy metabolism	Photosynthesis	13	52	0.0011448	0.054378
	Metabolism	Carbohydrate metabolism	Amino sugar and nucleotide sugar metabolism	17	107	0.0297736	0.471415
	Metabolism	Metabolism of cofactors and vitamins	Porphyrin and chlorophyll metabolism	8	41	0.04242	0.575699
	Genetic Information Processing	Folding, sorting and degradation	Protein processing in endoplasmic reticulum	29	176	0.00317165	0.100436
	Genetic Information Processing	Translation	Ribosome	37	273	0.0236124	0.448636
	Organismal Systems	Environmental adaptation	Plant-pathogen interaction	44	275	0.00055339	0.052572
	Cellular Processes	Transport and catabolism	Phagosome	15	77	0.00679429	0.161364
HT DSG-specific	Metabolism	Glycan biosynthesis and metabolism	Glycosylphosphatidylinositol(GPI)-anchor biosynthesis	14	20	0.0011203	0.0466791
	Metabolism	Nucleotide metabolism	Pyrimidine metabolism	50	103	0.00156137	0.0487929
	Metabolism	Nucleotide metabolism	Purine metabolism	62	137	0.00395497	0.083254
	Metabolism	Amino acid metabolism	Valine, leucine and isoleucine degradation	22	40	0.0051913	0.083254
	Metabolism	Glycan biosynthesis and metabolism	N-Glycan biosynthesis	25	47	0.00532826	0.083254
	Metabolism	Amino acid metabolism	Phenylalanine, tyrosine and tryptophan biosynthesis	19	35	0.01099	0.124886
	Metabolism	Global and Overview	Biosynthesis of amino acids	78	185	0.0122095	0.127183
	Metabolism	Carbohydrate metabolism	Propanoate metabolism	17	31	0.0139869	0.134489
	Metabolism	Amino acid metabolism	Arginine biosynthesis	16	31	0.0332349	0.230798
	Metabolism	Glycan biosynthesis and metabolism	Other glycan degradation	9	15	0.0357174	0.232077
	Metabolism	Lipid metabolism	Glycerophospholipid metabolism	34	77	0.0418263	0.237649
	Metabolism	Metabolism of other amino acids	beta-Alanine metabolism	16	32	0.0459382	0.249626
	Genetic Information Processing	Replication and repair	DNA replication	24	44	0.0041146	0.083254
	Genetic Information Processing	Transcription	Basal transcription factors	24	46	0.00857434	0.119088
	Genetic Information Processing	Folding, sorting and degradation	Ubiquitin mediated proteolysis	48	106	0.0104005	0.124886
	Genetic Information Processing	Translation	RNA transport	69	142	0.000207456	0.0228382
	Genetic Information Processing	Translation	mRNA surveillance pathway	50	98	0.000365412	0.0228382
	Genetic Information Processing	Transcription	Spliceosome	67	158	0.0167922	0.139935
	Genetic Information Processing	Replication and repair	Homologous recombination	21	42	0.0239404	0.187035
	Genetic Information Processing	Folding, sorting and degradation	RNA degradation	40	91	0.031259	0.229846
	Genetic Information Processing	Translation	Aminoacyl-tRNA biosynthesis	22	46	0.0371324	0.232077
	Genetic Information Processing	Translation	Ribosome biogenesis in eukaryotes	31	69	0.0395521	0.235429
	Environmental Information Processing	Signal transduction	Phosphatidylinositol signaling system	22	47	0.0479282	0.249626
	Environmental Information Processing	Membrane transport	ABC transporters	19	36	0.0159658	0.139935
HT DEG-DSG overlapped	Metabolism	Global and Overview	Carbon metabolism	27	214	0.000733939	0.044385
	Metabolism	Energy metabolism	Nitrogen metabolism	7	25	0.000887699	0.044385
	Metabolism	Energy metabolism	Carbon fixation in photosynthetic organisms	11	65	0.00318342	0.106114
	Metabolism	Amino acid metabolism	Alanine, aspartate and glutamate metabolism	8	42	0.00549168	0.137292
	Metabolism	Lipid metabolism	Steroid biosynthesis	6	29	0.0104363	0.208726
	Metabolism	Metabolism of terpenoids and polyketides	Brassinosteroid biosynthesis	3	9	0.0179508	0.270682
	Metabolism	Carbohydrate metabolism	Citrate cycle (TCA cycle)	7	42	0.0189477	0.270682
	Metabolism	Carbohydrate metabolism	Pyruvate metabolism	10	76	0.0270551	0.329722
	Metabolism	Lipid metabolism	Glycerolipid metabolism	8	56	0.029675	0.329722
	Metabolism	Metabolism of cofactors and vitamins	Nicotinate and nicotinamide metabolism	4	21	0.0462285	0.462285

## Sheet: HD
	KEGG_A_class	KEGG_B_class	Pathway	out (178)	All (3966)	Pvalue	Qvalue
HD DEG-specific	Metabolism	Energy metabolism	Photosynthesis	12	52	1.97618e-06	0.000122209
	Metabolism	Lipid metabolism	alpha-Linolenic acid metabolism	7	34	0.000625954	0.0166921
	Metabolism	Metabolism of terpenoids and polyketides	Zeatin biosynthesis	5	23	0.00299408	0.0479053
	Metabolism	Lipid metabolism	Fatty acid elongation	5	27	0.00621068	0.0828091
	Metabolism	Energy metabolism	Photosynthesis - antenna proteins	3	16	0.0323381	0.362456
	Metabolism	Biosynthesis of other secondary metabolites	Flavone and flavonol biosynthesis	2	7	0.0362456	0.362456
	Genetic Information Processing	Folding, sorting and degradation	Protein processing in endoplasmic reticulum	17	176	0.0020184	0.040368
	Organismal Systems	Environmental adaptation	Plant-pathogen interaction	30	275	3.05523e-06	0.000122209
HD DSG-specific	Metabolism	Glycan biosynthesis and metabolism	Other glycan degradation	13	15	0.00186391	0.0990425
	Metabolism	Glycan biosynthesis and metabolism	N-Glycan biosynthesis	32	47	0.00289829	0.0990425
	Metabolism	Glycan biosynthesis and metabolism	Glycosaminoglycan degradation	9	10	0.00657567	0.0990425
	Metabolism	Nucleotide metabolism	Pyrimidine metabolism	61	103	0.00849091	0.108684
	Metabolism	Glycan biosynthesis and metabolism	Glycosylphosphatidylinositol(GPI)-anchor biosynthesis	15	20	0.0107337	0.113731
	Metabolism	Metabolism of other amino acids	Taurine and hypotaurine metabolism	6	6	0.0109418	0.113731
	Metabolism	Metabolism of cofactors and vitamins	Nicotinate and nicotinamide metabolism	15	21	0.0213123	0.171086
	Metabolism	Amino acid metabolism	Histidine metabolism	13	18	0.028048	0.199453
	Metabolism	Amino acid metabolism	Valine, leucine and isoleucine degradation	25	40	0.0361744	0.243701
	Metabolism	Carbohydrate metabolism	Propanoate metabolism	20	31	0.0386537	0.247383
	Metabolism	Carbohydrate metabolism	Inositol phosphate metabolism	30	50	0.0455815	0.271698
	Metabolism	Lipid metabolism	Sphingolipid metabolism	17	26	0.0470358	0.271698
	Genetic Information Processing	Folding, sorting and degradation	RNA degradation	56	91	0.00370386	0.0990425
	Genetic Information Processing	Transcription	Spliceosome	91	158	0.00463842	0.0990425
	Genetic Information Processing	Folding, sorting and degradation	Protein export	30	45	0.00626945	0.0990425
	Genetic Information Processing	Translation	RNA transport	82	142	0.00639601	0.0990425
	Genetic Information Processing	Folding, sorting and degradation	Ubiquitin mediated proteolysis	62	106	0.0115508	0.113731
	Genetic Information Processing	Transcription	Basal transcription factors	29	46	0.0213858	0.171086
	Genetic Information Processing	Translation	Aminoacyl-tRNA biosynthesis	29	46	0.0213858	0.171086
	Genetic Information Processing	Translation	Ribosome biogenesis in eukaryotes	41	69	0.0263057	0.198066
	Human Diseases	Endocrine and metabolic diseases	AGE-RAGE signaling pathway in diabetic complications	9	12	0.048909	0.271698
	Environmental Information Processing	Signal transduction	Phosphatidylinositol signaling system	31	47	0.00696392	0.0990425
HD DEG-DSG overlapped	Metabolism	Carbohydrate metabolism	Galactose metabolism	13	47	1.12088e-06	0.000110967
	Metabolism	Carbohydrate metabolism	Pentose phosphate pathway	7	47	0.0155149	0.412072
	Metabolism	Global and Overview	Carbon metabolism	20	214	0.0173752	0.412072
	Metabolism	Lipid metabolism	Ether lipid metabolism	4	21	0.0281485	0.412072
	Metabolism	Lipid metabolism	Glycerophospholipid metabolism	9	77	0.0287764	0.412072
	Metabolism	Energy metabolism	Carbon fixation in photosynthetic organisms	8	65	0.0291364	0.412072
	Metabolism	Lipid metabolism	alpha-Linolenic acid metabolism	5	34	0.0407033	0.503704
	Environmental Information Processing	Signal transduction	Plant hormone signal transduction	21	204	0.0051156	0.253222
