# Supplementary material for: Alternative splicing in tea plants was extensively triggered by drought, heat and their combined stresses
Source: PeerJ. 2020 Jan 29;8:e8258. doi: 10.7717/peerj.8258 (PMC6995271; doi:10.7717/peerj.8258)
Supplement: Table S7 [file peerj-08-8258-s012.xlsx]

## Sheet: DT
Table S7 Statistical summary of SR genes that were alterantively spliced (under DT, HT and HD)
Gene ID	NR Description
CSA027996	gi|694415528|ref|XP_009335940.1| PREDICTED: serine/arginine-rich splicing factor RS2Z32-like isoform X1 [Pyrus x bretschneideri]
CSA002315	gi|778676805|ref|XP_011650664.1| PREDICTED: serine/arginine-rich splicing factor RS31 isoform X2 [Cucumis sativus]
CSA021237	gi|225441209|ref|XP_002266542.1| PREDICTED: arginine/serine-rich coiled-coil protein 2 isoform X2 [Vitis vinifera] gi|297739954|emb|CBI30136.3| unnamed protein product [Vitis vinifera]
CSA024736	gi|694395665|ref|XP_009373151.1| PREDICTED: serine/arginine-rich splicing factor SC35-like [Pyrus x bretschneideri]
CSA001126	gi|1026078155|ref|XP_016538272.1| PREDICTED: serine/arginine-rich splicing factor RS31 isoform X2 [Capsicum annuum]
CSA035998	gi|543176648|gb|AGV54347.1| serine/arginine rich splicing factor [Phaseolus vulgaris]
CSA005563	gi|568874443|ref|XP_006490325.1| PREDICTED: serine/arginine-rich splicing factor RS40 isoform X1 [Citrus sinensis] gi|568874445|ref|XP_006490326.1| PREDICTED: serine/arginine-rich splicing factor RS40 isoform X1 [Citrus sinensis]
CSA011857	gi|723660804|ref|XP_010325955.1| PREDICTED: serine/arginine-rich splicing factor RS41-like isoform X1 [Solanum lycopersicum] gi|969995707|ref|XP_015075555.1| PREDICTED: serine/arginine-rich splicing factor RS41-like isoform X1 [Solanum pennellii]
CSA030263	gi|566195508|ref|XP_006377863.1| arginine/serine-rich family protein [Populus trichocarpa] gi|118486874|gb|ABK95271.1| unknown [Populus trichocarpa] gi|550328402|gb|ERP55660.1| arginine/serine-rich family protein [Populus trichocarpa]
CSA024349	gi|1025203482|ref|XP_016477673.1| PREDICTED: serine/arginine-rich splicing factor SR34A-like isoform X2 [Nicotiana tabacum]
CSA019923	gi|225459316|ref|XP_002285794.1| PREDICTED: serine/arginine-rich splicing factor SC35 [Vitis vinifera] gi|731428373|ref|XP_010664318.1| PREDICTED: serine/arginine-rich splicing factor SC35 [Vitis vinifera] gi|731428375|ref|XP_010664320.1| PREDICTED: serine/arginine-rich splicing factor SC35 [Vitis vinifera] gi|731428377|ref|XP_010664321.1| PREDICTED: serine/arginine-rich splicing factor SC35 [Vit…
CSA002699	gi|224106315|ref|XP_002314126.1| transformer serine/arginine-rich ribonucleoprotein [Populus trichocarpa] gi|222850534|gb|EEE88081.1| transformer serine/arginine-rich ribonucleoprotein [Populus trichocarpa]

## Sheet: HT
Gene ID	NR Description
CSA027996	gi|694415528|ref|XP_009335940.1| PREDICTED: serine/arginine-rich splicing factor RS2Z32-like isoform X1 [Pyrus x bretschneideri]
CSA012608	gi|694324664|ref|XP_009353338.1| PREDICTED: serine/arginine-rich splicing factor RSZ22-like isoform X2 [Pyrus x bretschneideri]
CSA002315	gi|778676805|ref|XP_011650664.1| PREDICTED: serine/arginine-rich splicing factor RS31 isoform X2 [Cucumis sativus]
CSA021237	gi|225441209|ref|XP_002266542.1| PREDICTED: arginine/serine-rich coiled-coil protein 2 isoform X2 [Vitis vinifera] gi|297739954|emb|CBI30136.3| unnamed protein product [Vitis vinifera]
CSA024736	gi|694395665|ref|XP_009373151.1| PREDICTED: serine/arginine-rich splicing factor SC35-like [Pyrus x bretschneideri]
CSA035998	gi|543176648|gb|AGV54347.1| serine/arginine rich splicing factor [Phaseolus vulgaris]
CSA005563	gi|568874443|ref|XP_006490325.1| PREDICTED: serine/arginine-rich splicing factor RS40 isoform X1 [Citrus sinensis] gi|568874445|ref|XP_006490326.1| PREDICTED: serine/arginine-rich splicing factor RS40 isoform X1 [Citrus sinensis]
CSA011857	gi|723660804|ref|XP_010325955.1| PREDICTED: serine/arginine-rich splicing factor RS41-like isoform X1 [Solanum lycopersicum] gi|969995707|ref|XP_015075555.1| PREDICTED: serine/arginine-rich splicing factor RS41-like isoform X1 [Solanum pennellii]
CSA024349	gi|1025203482|ref|XP_016477673.1| PREDICTED: serine/arginine-rich splicing factor SR34A-like isoform X2 [Nicotiana tabacum]
CSA019923	gi|225459316|ref|XP_002285794.1| PREDICTED: serine/arginine-rich splicing factor SC35 [Vitis vinifera] gi|731428373|ref|XP_010664318.1| PREDICTED: serine/arginine-rich splicing factor SC35 [Vitis vinifera] gi|731428375|ref|XP_010664320.1| PREDICTED: serine/arginine-rich splicing factor SC35 [Vitis vinifera] gi|731428377|ref|XP_010664321.1| PREDICTED: serine/arginine-rich splicing factor SC35 [Vit…
CSA027895	gi|747101981|ref|XP_011099135.1| PREDICTED: CLK4-associating serine/arginine rich protein [Sesamum indicum]
CSA019724	gi|1009122556|ref|XP_015878064.1| PREDICTED: serine/arginine-rich splicing factor RS40 isoform X2 [Ziziphus jujuba] gi|1009122558|ref|XP_015878065.1| PREDICTED: serine/arginine-rich splicing factor RS40 isoform X2 [Ziziphus jujuba] gi|1009171278|ref|XP_015866658.1| PREDICTED: serine/arginine-rich splicing factor RS40-like isoform X2 [Ziziphus jujuba] gi|1009172953|ref|XP_015867553.1| PREDICTED: s…
CSA035887	gi|1035941906|gb|OAY67792.1| Serine/arginine-rich splicing factor SC35 [Ananas comosus]
CSA001126	gi|1026078155|ref|XP_016538272.1| PREDICTED: serine/arginine-rich splicing factor RS31 isoform X2 [Capsicum annuum]
CSA002699	gi|224106315|ref|XP_002314126.1| transformer serine/arginine-rich ribonucleoprotein [Populus trichocarpa] gi|222850534|gb|EEE88081.1| transformer serine/arginine-rich ribonucleoprotein [Populus trichocarpa]

## Sheet: HD
Gene ID	NR Description
CSA027996	gi|694415528|ref|XP_009335940.1| PREDICTED: serine/arginine-rich splicing factor RS2Z32-like isoform X1 [Pyrus x bretschneideri]
CSA012608	gi|694324664|ref|XP_009353338.1| PREDICTED: serine/arginine-rich splicing factor RSZ22-like isoform X2 [Pyrus x bretschneideri]
CSA002315	gi|778676805|ref|XP_011650664.1| PREDICTED: serine/arginine-rich splicing factor RS31 isoform X2 [Cucumis sativus]
CSA021237	gi|225441209|ref|XP_002266542.1| PREDICTED: arginine/serine-rich coiled-coil protein 2 isoform X2 [Vitis vinifera] gi|297739954|emb|CBI30136.3| unnamed protein product [Vitis vinifera]
CSA024736	gi|694395665|ref|XP_009373151.1| PREDICTED: serine/arginine-rich splicing factor SC35-like [Pyrus x bretschneideri]
CSA035998	gi|543176648|gb|AGV54347.1| serine/arginine rich splicing factor [Phaseolus vulgaris]
CSA005563	gi|568874443|ref|XP_006490325.1| PREDICTED: serine/arginine-rich splicing factor RS40 isoform X1 [Citrus sinensis] gi|568874445|ref|XP_006490326.1| PREDICTED: serine/arginine-rich splicing factor RS40 isoform X1 [Citrus sinensis]
CSA011857	gi|723660804|ref|XP_010325955.1| PREDICTED: serine/arginine-rich splicing factor RS41-like isoform X1 [Solanum lycopersicum] gi|969995707|ref|XP_015075555.1| PREDICTED: serine/arginine-rich splicing factor RS41-like isoform X1 [Solanum pennellii]
CSA024349	gi|1025203482|ref|XP_016477673.1| PREDICTED: serine/arginine-rich splicing factor SR34A-like isoform X2 [Nicotiana tabacum]
CSA019923	gi|225459316|ref|XP_002285794.1| PREDICTED: serine/arginine-rich splicing factor SC35 [Vitis vinifera] gi|731428373|ref|XP_010664318.1| PREDICTED: serine/arginine-rich splicing factor SC35 [Vitis vinifera] gi|731428375|ref|XP_010664320.1| PREDICTED: serine/arginine-rich splicing factor SC35 [Vitis vinifera] gi|731428377|ref|XP_010664321.1| PREDICTED: serine/arginine-rich splicing factor SC35 [Vit…
CSA027895	gi|747101981|ref|XP_011099135.1| PREDICTED: CLK4-associating serine/arginine rich protein [Sesamum indicum]
CSA019724	gi|1009122556|ref|XP_015878064.1| PREDICTED: serine/arginine-rich splicing factor RS40 isoform X2 [Ziziphus jujuba] gi|1009122558|ref|XP_015878065.1| PREDICTED: serine/arginine-rich splicing factor RS40 isoform X2 [Ziziphus jujuba] gi|1009171278|ref|XP_015866658.1| PREDICTED: serine/arginine-rich splicing factor RS40-like isoform X2 [Ziziphus jujuba] gi|1009172953|ref|XP_015867553.1| PREDICTED: s…
CSA002699	gi|224106315|ref|XP_002314126.1| transformer serine/arginine-rich ribonucleoprotein [Populus trichocarpa] gi|222850534|gb|EEE88081.1| transformer serine/arginine-rich ribonucleoprotein [Populus trichocarpa]
CSA035887	gi|1035941906|gb|OAY67792.1| Serine/arginine-rich splicing factor SC35 [Ananas comosus]
